# Supplementary material for: Surgical quality in organ procurement during day and night: an analysis of quality forms
Source: PubMed Central journal article supplement — BMJ Open. 2018 Nov 25;8(11):e022182. doi: 10.1136/bmjopen-2018-022182 (PMC6254412; doi:10.1136/bmjopen-2018-022182), 2018-11-25
Supplement: bmjopen-2018-022182.draft_revisions.pdf [file bmjopen-2018-022182.draft_revisions.pdf]

# BMJ Open

BMJ Open is committed to open peer review. As part of this commitment we make the peer review history of every article we publish publicly available.

When an article is published we post the peer reviewers' comments and the authors' responses online. We also post the versions of the paper that were used during peer review. These are the versions that the peer review comments apply to.

The versions of the paper that follow are the versions that were submitted during the peer review process. They are not the versions of record or the final published versions. They should not be cited or distributed as the published version of this manuscript.

BMJ Open is an open access journal and the full, final, typeset and author-corrected version of record of the manuscript is available on our site with no access controls, subscription charges or pay-per-view fees (<http://bmjopen.bmj.com>).

If you have any questions on BMJ Open's open peer review process please email [editorial.bmjopen@bmj.com](mailto:editorial.bmjopen@bmj.com)

# BMJ Open

## Surgical quality in organ procurement during day and night; an analysis of quality forms

|                               |                                                                                                                                                                                                                                                                                                                                                                                                                                                                                                                                                                                                                                                                                                                                                                |
|-------------------------------|----------------------------------------------------------------------------------------------------------------------------------------------------------------------------------------------------------------------------------------------------------------------------------------------------------------------------------------------------------------------------------------------------------------------------------------------------------------------------------------------------------------------------------------------------------------------------------------------------------------------------------------------------------------------------------------------------------------------------------------------------------------|
| Journal:                      | <i>BMJ Open</i>                                                                                                                                                                                                                                                                                                                                                                                                                                                                                                                                                                                                                                                                                                                                                |
| Manuscript ID                 | bmjopen-2018-022182                                                                                                                                                                                                                                                                                                                                                                                                                                                                                                                                                                                                                                                                                                                                            |
| Article Type:                 | Research                                                                                                                                                                                                                                                                                                                                                                                                                                                                                                                                                                                                                                                                                                                                                       |
| Date Submitted by the Author: | 20-Feb-2018                                                                                                                                                                                                                                                                                                                                                                                                                                                                                                                                                                                                                                                                                                                                                    |
| Complete List of Authors:     | de Boer, Jacob; Leids Universitair Medisch Centrum, Surgery;<br>Nederlandse Transplantatie Stichting<br>Bogt, Koen; Leids Universitair Medisch Centrum, Surgery; Medisch<br>Centrum Haaglanden, Surgery<br>Putter, Hein; Leids Universitair Medisch Centrum, Statistical Department<br>Ooms-de Vries, Kirsten; Nederlandse Transplantatie Stichting<br>Haase-Kromwijk, Bernadette; Nederlandse Transplantatie Stichting<br>Pol, RA; Universitair Medisch Centrum Groningen, Surgery<br>Jonge, Jeroen; Erasmus MC, Surgery<br>Dejong, Kees; Maastricht Universitair Medisch Centrum+, Surgery<br>Nijboer, Mijntje; Leids Universitair Medisch Centrum, Surgery<br>Vliet, Daan; Radboudumc, Surgery<br>Braat, Dries; Leids Universitair Medisch Centrum, Surgery |
| Keywords:                     | SURGERY, Risk management < HEALTH SERVICES ADMINISTRATION &<br>MANAGEMENT, Transplant surgery < SURGERY, Quality in health care <<br>HEALTH SERVICES ADMINISTRATION & MANAGEMENT                                                                                                                                                                                                                                                                                                                                                                                                                                                                                                                                                                               |
|                               |                                                                                                                                                                                                                                                                                                                                                                                                                                                                                                                                                                                                                                                                                                                                                                |

SCHOLARONE™  
Manuscripts

1  
2  
3 ***Surgical quality in organ procurement during day and night; an***  
4  
5  
6 ***analysis of quality forms***  
7

8 *J.D. de Boer MD<sup>1, 2,3\*</sup>, K.E.A. van der Bogt MD PhD<sup>2,3,4\*</sup>, H. Putter PhD<sup>5</sup>, K.M. Ooms-de*  
9  
10 *Vries MSc<sup>1</sup>, B.J.J.M. Haase-Kromwijk MSc<sup>1</sup>, R.A. Pol MD PhD<sup>6</sup>, J. de Jonge MD PhD<sup>7</sup>,*  
11  
12 *C.H.C. Dejong MD PhD<sup>8</sup>, W.N. Nijboer MD PhD<sup>2</sup>, J.A. Van der Vliet MD PhD<sup>9</sup>, A.E. Braat*  
13  
14 *MD PhD<sup>2</sup>. \* Both authors have contributed equally*  
15  
16

17  
18  
19 **Affiliations**  
20

21 *Dutch Transplant Foundation<sup>1</sup>;*  
22  
23 *Department of Surgery, Division of Transplantation<sup>2</sup>; Department of Medical Statistics<sup>5</sup>, Leiden*  
24  
25 *University Medical Center, Leiden University;*  
26  
27 *Fit to Perform Study Group, [www.ftop.eu](http://www.ftop.eu)<sup>3</sup>;*  
28  
29 *Haaglanden Medical Center The Hague Dept of Surgery<sup>4</sup>;*  
30  
31 *University Medical Center Groningen Dept of Surgery<sup>6</sup>;*  
32  
33 *Erasmus Medical Center Rotterdam Dept of Surgery<sup>7</sup>;*  
34  
35 *Maastricht University Medical Center Dept of Surgery<sup>8</sup>;*  
36  
37 *Radboud University Nijmegen Medical Center Dept of Surgery<sup>9</sup>*  
38  
39  
40

41 **Corresponding author:**  
42

43 J.D. de Boer MD, Leiden University Medical Center, Dept. of Surgery. Albinusdreef 2, 2333  
44  
45 ZA Leiden, The Netherlands. E-mail: [j.d.de\\_boer@lumc.nl](mailto:j.d.de_boer@lumc.nl). Reprints will not be available  
46  
47 from the authors.  
48  
49

50  
51 **Running title:** Surgical quality and time of procurement  
52  
53  
54  
55  
56  
57  
58  
59

**Disclosures:**

This research received no specific grant from any funding agency in the public, commercial or not-for-profit sectors. There are no conflicts of interest.

**Author contributions:**

J.D. de Boer, K.E.A. van der Bogt and A.E. Braat hypothesized that a relationship may be present between time of day and the incidence of surgical injury. Dr. Van der Bogt is involved in the Fit to Perform trial currently performed in The Netherlands. Data on procured organs are provided by all six transplanting centers in the Netherlands to the Dutch Transplant Foundation. Permission to use these was granted by delegates from all centers; R.A. Pol (Groningen), J. de Jonge (Rotterdam), C.H.C. Dejong (Maastricht), W.N. Nijboer (Leiden) and J.A. van der Vliet (Nijmegen). Data were then obtained via the Dutch Transplant Foundation where K. Ooms-De Vries and B. Haase were involved. Data were analysed and statistical analysis was performed and interpreted by J.D. de Boer, K.E.A. van der Bogt, A.E. Braat and H. Putter of the Statistical Department. The manuscript was then drafted by J.D. de Boer, K.E.A. van der Bogt, A.E. Braat and H. Putter. The draft manuscript was critically revised by all involved.

**Abbreviations:**

DCD, Donor after determination of circulatory death

DBD, Donor after determination of brain death

QF, Quality form

**Data sharing agreement**

1  
2  
3  
4  
5  
6  
7  
8  
9  
10  
11  
12  
13  
14  
15  
16  
17  
18  
19  
20  
21  
22  
23  
24  
25  
26  
27  
28  
29  
30  
31  
32  
33  
34  
35  
36  
37  
38  
39  
40  
41  
42  
43  
44  
45  
46  
47  
48  
49  
50  
51  
52  
53  
54  
55  
56  
57  
58  
59  
60

Data are available upon request at the Dutch Transplant Foundation. Plesmanlaan 100, 2332  
CB, Leiden.

**Words:** 2,284 words

For peer review only

**Abstract (252 words)****Objectives**

To analyse a potential association between surgical quality and time of day.

**Design**

A retrospective analysis of complete sets of quality forms filled out by the procuring and accepting surgeon on organs from deceased donors.

**Setting**

Procurement procedures in the Netherlands are organized per region. All procedures are performed by an independent, dedicated procurement team that is associated with an academic medical center in the region.

**Participants**

In 18 months' time, 771 organs were accepted and procured in The Netherlands. Of these, 17 organs were declined before transport and therefore excluded. For the remaining 754 organs, 591 (78%) sets of forms were completed (procurement and transplantation). Baseline characteristics were comparable in both groups with the exception of height ( $p=0.003$ ).

**Primary outcome measure**

All complete sets of quality forms were retrospectively analyzed for the primary outcome, procurement related surgical injury. Organs were categorized based on the starting time of the procurement in either day- (8AM–5PM) or evening/night-time (5PM–8AM).

**Results:**

Out of 591 procured organs, 129 organs (22%) were procured during daytime and 462 organs (78%) during evening/night-time. The incidence of surgical injury was significantly lower during daytime; 22 organs (17%) were injured during daytime compared to 126 organs (27%) during evening/night-time procurement ( $p=0.016$ ). This association persists when adjusted for confounders.

### Conclusions:

This study shows an increased incidence of procurement related surgical injury in evening/night-time procedures as compared to daytime. Time of day might (in)directly influence surgical performance and should be considered a potential risk factor for injury in organ procurement procedures.

### Strengths and limitations

- Quality of procurement is evaluated by two specialists; once by the procuring and once by the accepting surgeon. (+)
- All procedures are performed by a dedicated, certified procurement team. This ensures a high standard of procurement quality. (+)
- Selection bias in the timing of procurements is minimally present because the planning is mainly logistical rather than medical. (+)
- Injury is evaluated in a categorical way (yes/no) to analyze surgical performance in a broad sense. It avoids a loss of detailed information but limits a sub analysis on injuries leading to discarding organs.
- Conclusions may be limited by the number of procured organs. (-)

## Introduction

Nights shifts have been shown to pose a higher risk for errors and self-injuries in several medical settings<sup>1-4</sup>. A negative effect of nights shifts might be caused by factors associated with fatigue and circadian rhythm<sup>5</sup> and could also affect surgical performance. The potential relation between timing of procedures and surgical performance, is however not clear.

Studies have reported conflicting results<sup>6-10</sup> and timing of procedures might therefore affect patients' safety. The discussion on the topic, has contributed to reforms in working hours for surgical residents in the US, as well as in Europe.

The lack of evidence for a causative relationship between fatigue related factors and inferior performance in surgery is interesting considering the extensive amount of evidence in other fields<sup>11,12</sup>. Although it might hold true that surgical performance is not affected by fatigue or time of day, it could also be a consequence of an insufficiently sensitive measurement of technical proficiency. To measure surgical performance, a negative clinical outcome in patients would be the most obvious endpoint. This has however some limitations. A clinical endpoint might lead to a loss of detailed information because only severe intra-operative injuries are likely recognized for their clinical impact while minor injuries might be missed. Secondly, it is very difficult to relate a specific surgical action to an event in a patient. On one hand, because not all intra-operative injuries are noticed, on the other, because outcome after surgical procedures is highly multi-factorial and complex. A potential (minor) effect of time of day on surgical performance might therefore not be noticed when solely focussing on clinical outcome measures.

The Dutch digital feedback system on the quality of organ procurement offers an opportunity to analyse surgical performance in detail. We have previously analysed this dataset on procurement related surgical injuries and found a high incidence of non-critical injuries. We furthermore, did not find a significant difference between the non-critically injured and intact



1  
2  
3 organs for one year graft survival<sup>13</sup>. In this study, surgical injury is considered as a sensitive  
4  
5 proxy of surgical performance. We hypothesize that a relation is present between surgical  
6  
7 performance and time of day.  
8  
9  
10  
11  
12  
13  
14  
15  
16  
17  
18  
19  
20  
21  
22  
23  
24  
25  
26  
27  
28  
29  
30  
31  
32  
33  
34  
35  
36  
37  
38  
39  
40  
41  
42  
43  
44  
45  
46  
47  
48  
49  
50  
51  
52  
53  
54  
55  
56  
57  
58  
59  
60

For peer review only

## Methods

We obtained data from the Dutch Transplant Foundation on quality forms filled out from March 2012 until September 2013. It comprises two forms on each individual abdominal organ that is procured and accepted in The Netherlands. One form is filled out by the procuring surgeon after procurement and remarks are placed in the second form by the accepting surgeon. Detailed information is registered on packaging, perfusion (time/volume/fluid), anatomy and possible injury of vessels or organs. In case of a discrepancy between the procuring and accepting surgeons, remarks of the accepting surgeon were considered leading. Pancreata procured for islet-isolation and organs that were declined before transportation to the accepting center were excluded.

We accepted starting time of the cold perfusion of the aorta as starting time of the procedure. For donation after circulatory determination of death (DCD) this is almost at the same time, but for donation after determination of brain death (DBD) this usually is 1 – 2 hours after skin incision. All organs were categorized in two groups; daytime (when procured between 8AM and 5PM) or evening/night-time (when procured between 5PM and 8AM). The incidence of injury as binary outcome (yes/no) was compared between both groups using univariate logistic regression with time of day as sole covariate. The analyses were adjusted separately and for all available confounders related to procurement related injury in literature. These factors include body mass index (BMI) and donor type (DCD or DBD)<sup>13</sup>. Lastly, also height (cm) was included in the univariate and multivariate analysis since it was significantly different in both groups.

The relationship between injury and starting time of the procedure was visualized as a log odds ratio on a continuous 24 hours' scale by using splines regression. To correct for a possible correlation of injury within donor procedures, sandwich estimators of the standard

1  
2  
3 errors were used. A p-value of  $<0.05$  was considered statistically significant and analyses  
4  
5 were performed with SPSS version 22.0 and R version 2.3.3.  
6

7 Patients were not involved in the development of the research question or in the design of the  
8  
9 study. No ethical statement was required according to national ethical guidelines. Data are  
10  
11 available upon request at the Dutch Transplant Foundation. Permission for this analysis was  
12  
13 granted by the national competent authority, the Dutch Transplant Foundation, on April 6<sup>th</sup>,  
14  
15 2017.  
16  
17  
18  
19  
20  
21  
22  
23  
24  
25  
26  
27  
28  
29  
30  
31  
32  
33  
34  
35  
36  
37  
38  
39  
40  
41  
42  
43  
44  
45  
46  
47  
48  
49  
50  
51  
52  
53  
54  
55  
56  
57  
58  
59  
60

## Results

During the study period, 771 organs were accepted for transplantation. Out of these, 17 organs were declined during procurement and subsequently not transported and therefore excluded (5 livers, 8 pancreata and 4 kidneys). For all 754 accepted and transported organs, 591 forms were completed (591/754, 78%) on 133 livers (23%), 38 pancreata (6%) and 420 kidneys (71%). Response rates per organ were respectively 87%, 90% and 75%. There were 148 (148/591=25%) organs with reported injuries; 36 livers (36/133, 27%), 10 pancreata (10/38, 26%) and 102 kidneys (102/420, 24%). Of all injured organs, 12 (2%) were discarded because of this surgical injury; 1/133 (0.8%) liver, 5/38 (13%) pancreata and 6/420 (1.4%) kidneys ( $p<0.001$ ).

### *Day and night-time operating hours*

With the exception of donor height ( $p=0.003$ ) organs were comparable in demographical characteristics in the daytime and evening/night-time groups in univariate analysis as shown in table 1.

**Table 1.** Demographics of the study population (n=591). Only height is different between the two groups (p=0.003).

|                  | Daytime (8AM-5PM)<br>n=129 |        |           | Evening and nighttime (5PM-8AM), n=462 |        |           |              |
|------------------|----------------------------|--------|-----------|----------------------------------------|--------|-----------|--------------|
|                  | Mean (SD)                  | Median | Range     | Mean (SD)                              | Median | Range     | p-value      |
| <b>Age</b>       | 51.8 (15.3)                | 55     | 14-76     | 52.2 (15.6)                            | 55     | 10-78     | 0.772        |
| <b>Height</b>    | 177.4 (7.1)                | 180    | 161-198   | 174.8 (9.4)                            | 175    | 140-200   | <b>0.003</b> |
| <b>Weight</b>    | 76.6 (13.4)                | 78     | 52-120    | 76.6 (15.1)                            | 77     | 35-150    | 0.996        |
| <b>BMI</b>       | 24.3 (3.6)                 | 24.0   | 17.6-34.7 | 25.0 (4.1)                             | 24.7   | 12.5-46.3 | 0.080        |
|                  | <b>n (%)</b>               |        |           | <b>n (%)</b>                           |        |           |              |
| <b>Sex</b>       |                            |        |           |                                        |        |           |              |
| Male             | 75 (58)                    |        |           | 256 (55)                               |        |           |              |
| Female           | 54 (42)                    |        |           | 206 (45)                               |        |           | 0.581        |
| <b>Donortype</b> |                            |        |           |                                        |        |           |              |
| DBD              | 69 (53)                    |        |           | 210 (45)                               |        |           |              |
| DCD              | 60 (47)                    |        |           | 252 (55)                               |        |           | 0.106        |

Volume related regional effects that also may impact the risk of surgical injury<sup>13</sup>, were not significantly different between both groups (data not shown). During daytime, 129 of 591 organs (22%) were procured and 462 organs (78%) were procured during evening/night-time. There was a significant lower chance of organ injury during daytime procurements; 22 organs (17%) were injured during daytime and 126 organs (27%) during evening/night-time (p=0.016).

1  
2  
3 Evening/night-time procedures remained a factor independent and significantly associated  
4 with injury (p=0.029) when univariate and multivariate adjusted for height, BMI and donor  
5 type.  
6  
7  
8  
9

### 10 *Circadian points*

11  
12 Figure 1 shows an increased risk of injury for procedures that start in evening/night-time. The  
13 highest risk of organ injury was for procedures starting around 9PM, the lowest risk for  
14 procedures starting around 12PM (noon).  
15  
16  
17  
18  
19  
20  
21  
22  
23  
24  
25  
26  
27  
28  
29  
30  
31  
32  
33  
34  
35  
36  
37  
38  
39  
40  
41  
42  
43  
44  
45  
46  
47  
48  
49  
50  
51  
52  
53  
54  
55  
56  
57  
58  
59  
60

## Discussion

This study shows a relationship between surgical performance and the starting time of the procurement procedure. A higher incidence of surgical injury is measured in evening/night-time procedures as compared to daytime procedures. This association persists when adjusted for important confounders.

The relation between surgical performance and timing of surgical procedures is often highly confounded. Patients have more complicated and/or acute problems during the night<sup>14</sup>. Also, access to imaging and laboratory testing as well as specialized OR nurses and anesthesiologists might be less available during night-time<sup>13</sup>. The study population of this study, abdominal organs from deceased donors, eliminates several of these confounders. Most procedures can generally be scheduled within 6-24 hours regardless of the cause of brain death because these patients are usually hemodynamically stable. A higher number of procurement procedures during evening/night-time therefore seems to rather reflect issues with operating room (OR) availability during the day than an abundance of emergency procedures. Secondly, abdominal organ procurement is well organized in The Netherlands; each sub region has a 24/7 availability of a self-supporting, certified organ procurement team. Such a team includes for daytime as well as for evening/night-time procedures two dedicated nurses as well as a dedicated anesthesiologist and two surgeons, of who at least one is certified for procurement procedures. They are not involved in other clinical activities while on duty. The extensive training to become certified and the absence of other clinical activities when on call, ensure a high quality of organ procurement and eliminates a major variance in operating staff. In addition, differences in hospital facilities (local vs. academical) should be minimal because the teams bring own standard supplies for the procedure. In our opinion, this offers a unique setting.

1  
2  
3 Another strength of this study are the very small differences in baseline characteristics of the  
4 day- and evening/night-time groups. Only donor height was different between both groups  
5 and so far this factor has not been described to influence the risk of organ injury. The  
6 similarity between both groups is likely associated with the planning of procedures;  
7 independent of donor characteristics and solely dependent of OR availability. Other relevant  
8 and non-measured donor associated variables like vascular anatomy can therefore be assumed  
9 to be equal in both groups since they do not affect the starting time of procedures. Factors  
10 that might have been different and might have influenced our results, include volume related  
11 regional effects as previously described<sup>13</sup>. The ratio between regions for day- and  
12 evening/night-time procedures was however not different (data not shown).  
13  
14  
15  
16  
17  
18  
19  
20  
21  
22  
23

24  
25 In this study, we evaluated all surgical injury in a strict categorical way (yes/no) to analyze  
26 surgical performance in a broad sense and to avoid a loss of detailed information. In further  
27 studies, it could be of relevance to further specify the definition, type and impact of injury. In  
28 the current data for example, the number of critical injuries –leading to discarding of the  
29 organ- (n=12) are insufficient for an adequate comparison in day- and evening/night-time  
30 groups.  
31  
32  
33  
34  
35  
36  
37

38 A limitation of this study is the response rate for complete sets of forms of 80%; a higher  
39 response rate might have led to a higher reported number of (critical) injuries. Although the  
40 response rate could have been better, it is to be noted, that the current response rate concerns  
41 organs on which two forms are digitally filled out by two independent surgeons. This two-  
42 way registration can be considered to be precise and objective.  
43  
44  
45  
46  
47  
48  
49

50 Our results are in accordance with (non-surgical) medical studies that report a negative  
51 relation between evening/night-time or fatigue related factors and performance; a higher rate  
52 of self-injuries among residents<sup>3</sup> and a decreased proficiency in surgical simulations after  
53  
54  
55  
56  
57  
58  
59  
60



1  
2  
3 night shifts<sup>8</sup>. These results are conflicting with large surgical database studies that show no  
4  
5 difference in conversion rates during cholecystectomy or outcome in patients like the  
6  
7 occurrence of serious adverse events<sup>6,15</sup>. Rothschild *et al.* on the other hand, found an  
8  
9 increased rate of complications among post night-time surgical procedures performed by  
10  
11 physicians with sleep opportunities of less than 6 hours<sup>10</sup>. A study on liver transplantations,  
12  
13 found that operations during night-time took longer and were associated with a higher risk of  
14  
15 early death, although without any effect on peri-operative complications or long-term  
16  
17 survival<sup>16</sup>. Also in kidney transplantation, more peri-operative complications<sup>17</sup> but also less  
18  
19 technical graft failure<sup>18</sup> were seen in night-time procedures. The latter did not take into  
20  
21 account a difference in surgical experience between day- and night-time procedures; night-  
22  
23 time procedures are rather performed by consulting surgeons as compared to daytime  
24  
25 procedures that are usually performed by (supervised) surgical residents. In the current study  
26  
27 however, all procedures are performed by the same group of dedicated surgeons and teams.  
28  
29 These studies seem to report contradictory findings between short term or non-patient  
30  
31 outcomes on the one hand and long-term outcome in patients. This observation, is reflected in  
32  
33 our data; we notice a higher incidence of surgical injuries during night-time (this study) but  
34  
35 no difference in one year graft survival between injured and intact organs in a previous  
36  
37 analysis of the same cohort<sup>13</sup>. It indicates that the pathway leading to a negative outcome in  
38  
39 surgical patients is complex and multi-factorial; only most severe surgical injuries might  
40  
41 result in clinically measurable negative outcome. To find a significant difference in outcome  
42  
43 in patients that can be related to the timing of procedures or 'fitness' of surgeons, higher  
44  
45 numbers are probably needed. This study can therefore only assess (technical) surgical  
46  
47 performance.  
48  
49  
50  
51

52  
53 The increased injury rates during evening/night-time operating hours may indicate that  
54  
55 surgical performance is affected by time of day. The etiology of this association is however  
56  
57  
58  
59

1  
2  
3 not yet clear. The negative effect of evening/night-time procedures suggests an effect of  
4  
5 fatigue related factors. Fatigue was however not measured in this study and should  
6  
7 theoretically play a smaller role because procurement teams can rest between procedures and  
8  
9 do not participate in other clinical activities when on call. Other mechanisms might however  
10  
11 contribute; the surgical injury pattern in this study shows, for example, a remarkable  
12  
13 resemblance with circadian rhythm and associated biological hormone levels as observed in  
14  
15 chronobiology<sup>19</sup>. To further identify the mechanism behind the higher injury rate during  
16  
17 evening/night-time, it will be essential to objectively measure the surgeon's fitness before  
18  
19 and after procurement. Current research on the validation and clinical application of such a  
20  
21 "Fit to Perform" test is ongoing<sup>20</sup>. It might give an objective tool to evaluate the relation  
22  
23 between the fitness of a surgeon and his surgical performance.  
24  
25

26  
27 We believe this study shows, that evening/night-time procedures might present a suboptimal  
28  
29 setting for organ procurement. Although the causal pathway is not yet clear, our results do  
30  
31 suggest that time of day should be taken into account to optimize the quality of organ  
32  
33 procurement. It may even be of relevance for other surgical procedures. This would mean  
34  
35 that, in the absence of acute pathology, surgeries should be preferably performed during  
36  
37 daytime.  
38  
39  
40  
41

## 42 **Conclusion**

43  
44  
45 This study shows an increased incidence of surgical injury in organ procurement procedures  
46  
47 during evening/night-time, as compared to daytime. Time of day might (in)directly influence  
48  
49 surgical performance and should be considered a potential risk factor for injury in organ  
50  
51 procurements.  
52  
53  
54  
55  
56  
57  
58  
59  
60

## Acknowledgements

The authors would like to gratefully acknowledge Cynthia Konijn, Dilesh Kishoendajal and Steffen de Groot (Dutch Organ Transplant Registry) for their efforts in collecting the data.

## Figure legends:

Figure 1. The relationship between starting time of the cold perfusion of the aorta and risk of injury.

**References:**

1. Landrigan C, Rothschild J, Cronin J, et al. Effect of reducing interns' work hours on serious medical errors in intensive care units. *N Engl J Med*. 2004;351(18):1838-1848.
2. Rodriguez-Jareño MC, Demou E, Vargas-Prada S, et al. European Working Time Directive and doctors' health: a systematic review of the available epidemiological evidence. *BMJ Open*. 2014;4(7):e004916. doi:10.1136/bmjopen-2014-004916.
3. Ayas NT, Barger LK, Cade BE, et al. Extended work duration and the risk of self-reported percutaneous injuries in interns. *JAMA*. 2006;296(9):1055-1062. doi:10.1097/01.AOG.0000252305.52668.c0.
4. Arnedt JT, Owens J, Crouch M, Stahl J, Carskadon M a. Neurobehavioral performance of residents after heavy night call vs after alcohol ingestion. *JAMA*. 2005;294(9):1025-1033. doi:10.1097/01.sa.0000185353.45824.bc.
5. Griffith C, Mahadevan S. Sleep-deprivation effect on human performance: a meta-analysis approach. *J Sleep Res Sleep Med*. 2006;19(4):318-326. doi:10.1115/1.802442.paper185.
6. Vinden C, Nash DM, Rangrej J, et al. Complications of daytime elective laparoscopic cholecystectomies performed by surgeons who operated the night before. *Jama*. 2013;310(17):1837-1841. doi:10.1001/jama.2013.280372.
7. Grantcharov TP, Bardram L, Funch-Jensen P, Rosenberg J. Laparoscopic performance after one night on call in a surgical department: prospective study. *BMJ*. 2001;323(7323):1222-1223. doi:10.1136/bmj.323.7323.1222.
8. Brandenberger J, Kahol K, Feinstein AJ, Ashby A, Smith M, Ferrara JJ. Effects of duty hours and time of day on surgery resident proficiency. *Am J Surg*. 2010;200(6):814-819. doi:10.1016/j.amjsurg.2010.06.009.

- 1  
2  
3 9. Wiesner R, Edwards E, Freeman R, et al. Model for end-stage liver disease (MELD)  
4 and allocation of donor livers. *Gastroenterology*. 2003;124(1):91-96.  
5  
6 doi:10.1053/gast.2003.50016.  
7
- 8  
9 10. Rothschild JM, Keohane CA, Rogers S, et al. Risks of complications by attending  
10 physicians after performing nighttime procedures. *JAMA - J Am Med Assoc*.  
11  
12 2009;302(14):1565-1572. doi:10.1001/jama.2009.1423.  
13
- 14  
15 11. Connor J, Norton R, Ameratunga S, et al. Driver sleepiness and risk of serious injury  
16 to car occupants: population based case control study. *BMJ*. 2002;324(7346):1125.  
17  
18 doi:10.1136/bmj.324.7346.1125.  
19
- 20  
21 12. Horne JA, Reyner LA. Sleep related vehicle accidents. *Bmj*. 1995;310(6979):565-567.  
22  
23 doi:10.1136/bmj.310.6979.565.  
24
- 25  
26 13. de Boer JD, Kopp WH, Ooms K, et al. Abdominal organ procurement in the  
27 Netherlands – an analysis of quality and clinical impact. *Transpl Int*. 2017;30(3).  
28  
29 doi:10.1111/tri.12906.  
30
- 31  
32 14. Anselmi L, Meacock R, Kristensen SR, Doran T, Sutton M. Arrival by ambulance  
33 explains variation in mortality by time of admission: Retrospective study of  
34 admissions to hospital following emergency department attendance in England. *BMJ*  
35  
36 *Qual Saf*. 2017;26(8):613-621. doi:10.1136/bmjqs-2016-005680.  
37
- 38  
39 15. Anand Govindarajan, M.D., David R. Urbach, M.D., Matthew Kumar, M.Sc., Qi Li,  
40  
41 M.Sc., Brian J. Murray, M.D., David Juurlink, M.D., Ph.D., Erin Kennedy, M.D.,  
42  
43 Ph.D., Anna Gagliardi PD. Outcomes of Daytime Procedures Performed by Attending  
44  
45 Surgeons after Night Work. *N Engl J Med* . 2015;373:845-853.  
46  
47 doi:10.1056/NEJMsa1415994.  
48
- 49  
50 16. Lonze BE, Parsikia A, Feyssa EL, et al. Operative start times and complications after  
51  
52 liver transplantation. *Am J Transplant*. 2010;10(8):1842-1849. doi:10.1111/j.1600-  
53  
54  
55  
56  
57  
58  
59

- 1  
2  
3 6143.2010.03177.x.  
4  
5 17. Fechner G, Pezold C, Hauser S, Gerhardt T, Müller SC. Kidney's Nightshift, Kidney's  
6  
7 Nightmare? Comparison of Daylight and Nighttime Kidney Transplantation: Impact  
8  
9 on Complications and Graft Survival. *Transplant Proc.* 2008;40(5):1341-1344.  
10  
11 doi:10.1016/j.transproceed.2008.02.072.  
12  
13 18. Özdemir DMD, Andries VB, Jagt MFP Van Der, Frank C, Rogier A. Nighttime kidney  
14  
15 transplantation is associated with less pure technical graft failure. 2016:955-961.  
16  
17 doi:10.1007/s00345-015-1679-0.  
18  
19 19. Jasper I, Roenneberg T, Häußler A, Zierdt A, Marquardt C, Hermsdörfer J. Circadian  
20  
21 Rhythm in Force Tracking and in Dual Task Costs. *Chronobiol Int.* 2010;27(3):653-  
22  
23 673. doi:10.3109/07420521003663793.  
24  
25  
26 20. Huizinga C, van der Bogt K. FTOP - a nationwide multicentre observational study to  
27  
28 investigate the fitness to perform of around-the-clock medical specialists. NTR5309.  
29  
30 www.trialregister.nl/trialreg/admin/rctview.asp?TC=5309. Published 2015.  
31  
32  
33  
34  
35  
36  
37  
38  
39  
40  
41  
42  
43  
44  
45  
46  
47  
48  
49  
50  
51  
52  
53  
54  
55  
56  
57  
58  
59  
60

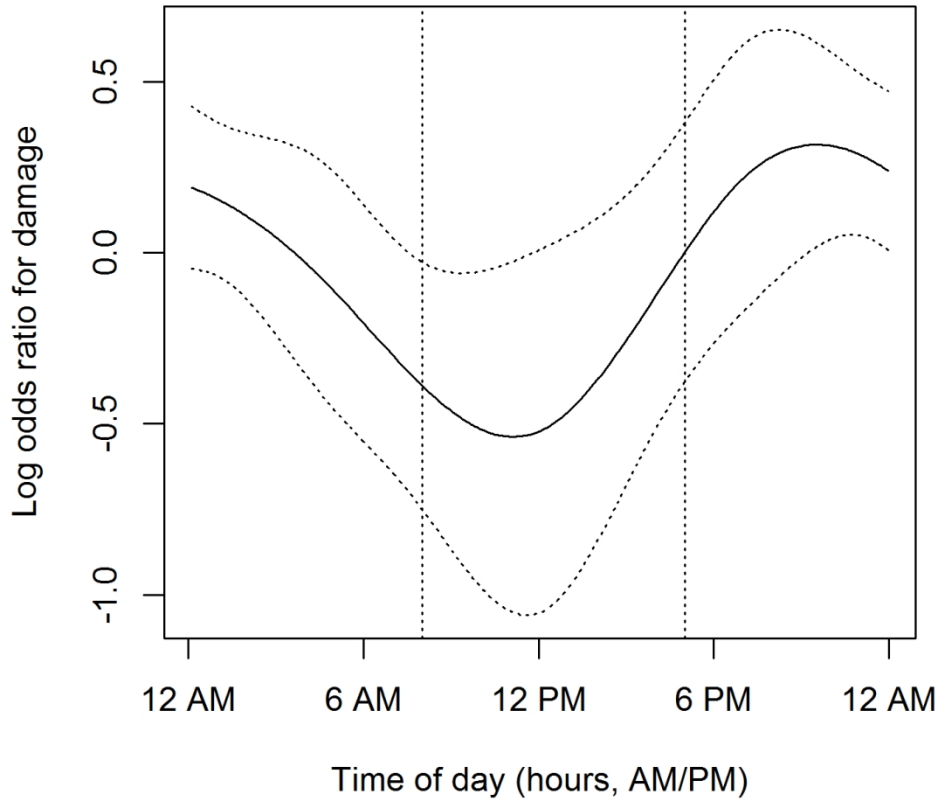

Figure 1. The relationship between starting time of the cold perfusion of the aorta and risk of injury.

127x127mm (300 x 300 DPI)

**STROBE 2007 (v4) Statement—Checklist of items that should be included in reports of *cohort studies***

| Section/Topic            | Item # | Recommendation                                                                                                                                                                       | Reported on page # |
|--------------------------|--------|--------------------------------------------------------------------------------------------------------------------------------------------------------------------------------------|--------------------|
| Title and abstract       | 1      | (a) Indicate the study's design with a commonly used term in the title or the abstract                                                                                               | Title page         |
|                          |        | (b) Provide in the abstract an informative and balanced summary of what was done and what was found                                                                                  | 1                  |
| <b>Introduction</b>      |        |                                                                                                                                                                                      |                    |
| Background/rationale     | 2      | Explain the scientific background and rationale for the investigation being reported                                                                                                 | 4-5                |
| Objectives               | 3      | State specific objectives, including any prespecified hypotheses                                                                                                                     | 1 and 5            |
| <b>Methods</b>           |        |                                                                                                                                                                                      |                    |
| Study design             | 4      | Present key elements of study design early in the paper                                                                                                                              | 6                  |
| Setting                  | 5      | Describe the setting, locations, and relevant dates, including periods of recruitment, exposure, follow-up, and data collection                                                      | 6                  |
| Participants             | 6      | (a) Give the eligibility criteria, and the sources and methods of selection of participants. Describe methods of follow-up                                                           | 6                  |
|                          |        | (b) For matched studies, give matching criteria and number of exposed and unexposed                                                                                                  | n/a                |
| Variables                | 7      | Clearly define all outcomes, exposures, predictors, potential confounders, and effect modifiers. Give diagnostic criteria, if applicable                                             | 6                  |
| Data sources/measurement | 8*     | For each variable of interest, give sources of data and details of methods of assessment (measurement). Describe comparability of assessment methods if there is more than one group | 6                  |
| Bias                     | 9      | Describe any efforts to address potential sources of bias                                                                                                                            | 10-11 and 12-13    |
| Study size               | 10     | Explain how the study size was arrived at                                                                                                                                            | 6                  |
| Quantitative variables   | 11     | Explain how quantitative variables were handled in the analyses. If applicable, describe which groupings were chosen and why                                                         | 12                 |
| Statistical methods      | 12     | (a) Describe all statistical methods, including those used to control for confounding                                                                                                | 6                  |
|                          |        | (b) Describe any methods used to examine subgroups and interactions                                                                                                                  | 6                  |
|                          |        | (c) Explain how missing data were addressed                                                                                                                                          | 13                 |
|                          |        | (d) If applicable, explain how loss to follow-up was addressed                                                                                                                       | n/a                |
|                          |        | (e) Describe any sensitivity analyses                                                                                                                                                | 6                  |
| <b>Results</b>           |        |                                                                                                                                                                                      |                    |



|                          |     |                                                                                                                                                                                                              |       |
|--------------------------|-----|--------------------------------------------------------------------------------------------------------------------------------------------------------------------------------------------------------------|-------|
| Participants             | 13* | (a) Report numbers of individuals at each stage of study—eg numbers potentially eligible, examined for eligibility, confirmed eligible, included in the study, completing follow-up, and analysed            | 8     |
|                          |     | (b) Give reasons for non-participation at each stage                                                                                                                                                         | n/a   |
|                          |     | (c) Consider use of a flow diagram                                                                                                                                                                           | n/a   |
| Descriptive data         | 14* | (a) Give characteristics of study participants (eg demographic, clinical, social) and information on exposures and potential confounders                                                                     | 8     |
|                          |     | (b) Indicate number of participants with missing data for each variable of interest                                                                                                                          | 8     |
|                          |     | (c) Summarise follow-up time (eg, average and total amount)                                                                                                                                                  | n/a   |
| Outcome data             | 15* | Report numbers of outcome events or summary measures over time                                                                                                                                               | 8     |
| Main results             | 16  | (a) Give unadjusted estimates and, if applicable, confounder-adjusted estimates and their precision (eg, 95% confidence interval). Make clear which confounders were adjusted for and why they were included | 6     |
|                          |     | (b) Report category boundaries when continuous variables were categorized                                                                                                                                    | 13    |
|                          |     | (c) If relevant, consider translating estimates of relative risk into absolute risk for a meaningful time period                                                                                             | (9)   |
| Other analyses           | 17  | Report other analyses done—eg analyses of subgroups and interactions, and sensitivity analyses                                                                                                               | n/a   |
| <b>Discussion</b>        |     |                                                                                                                                                                                                              |       |
| Key results              | 18  | Summarise key results with reference to study objectives                                                                                                                                                     | 10    |
| <b>Limitations</b>       |     |                                                                                                                                                                                                              |       |
| Interpretation           | 20  | Give a cautious overall interpretation of results considering objectives, limitations, multiplicity of analyses, results from similar studies, and other relevant evidence                                   | 11-12 |
| Generalisability         | 21  | Discuss the generalisability (external validity) of the study results                                                                                                                                        | 13    |
| <b>Other information</b> |     |                                                                                                                                                                                                              |       |
| Funding                  | 22  | Give the source of funding and the role of the funders for the present study and, if applicable, for the original study on which the present article is based                                                | 3     |

\*Give information separately for cases and controls in case-control studies and, if applicable, for exposed and unexposed groups in cohort and cross-sectional studies.

**Note:** An Explanation and Elaboration article discusses each checklist item and gives methodological background and published examples of transparent reporting. The STROBE checklist is best used in conjunction with this article (freely available on the Web sites of PLoS Medicine at <http://www.plosmedicine.org/>, Annals of Internal Medicine at <http://www.annals.org/>, and Epidemiology at <http://www.epidem.com/>). Information on the STROBE Initiative is available at [www.strobe-statement.org](http://www.strobe-statement.org).

# BMJ Open

## Surgical quality in organ procurement during day and night; an analysis of quality forms

|                                 |                                                                                                                                                                                                                                                                                                                                                                                                                                                                                                                                                                                                                                                                                                                                                         |
|---------------------------------|---------------------------------------------------------------------------------------------------------------------------------------------------------------------------------------------------------------------------------------------------------------------------------------------------------------------------------------------------------------------------------------------------------------------------------------------------------------------------------------------------------------------------------------------------------------------------------------------------------------------------------------------------------------------------------------------------------------------------------------------------------|
| Journal:                        | <i>BMJ Open</i>                                                                                                                                                                                                                                                                                                                                                                                                                                                                                                                                                                                                                                                                                                                                         |
| Manuscript ID                   | bmjopen-2018-022182.R1                                                                                                                                                                                                                                                                                                                                                                                                                                                                                                                                                                                                                                                                                                                                  |
| Article Type:                   | Research                                                                                                                                                                                                                                                                                                                                                                                                                                                                                                                                                                                                                                                                                                                                                |
| Date Submitted by the Author:   | 11-Jun-2018                                                                                                                                                                                                                                                                                                                                                                                                                                                                                                                                                                                                                                                                                                                                             |
| Complete List of Authors:       | de Boer, Jacob; Leids Universitair Medisch Centrum, Surgery; Nederlandse Transplantatie Stichting<br>Bogt, Koen; Leids Universitair Medisch Centrum, Surgery; Medisch Centrum Haaglanden, Surgery<br>Putter, Hein; Leids Universitair Medisch Centrum, Statistical Department<br>Ooms-de Vries, Kirsten; Nederlandse Transplantatie Stichting<br>Haase-Kromwijk, Bernadette; Nederlandse Transplantatie Stichting<br>Pol, RA; Universitair Medisch Centrum Groningen, Surgery<br>Jonge, Jeroen; Erasmus MC, Surgery<br>Dejong, Kees; Maastricht Universitair Medisch Centrum+, Surgery<br>Nijboer, Mijntje; Leids Universitair Medisch Centrum, Surgery<br>Vliet, Daan; Radboudumc, Surgery<br>Baat, Dries; Leids Universitair Medisch Centrum, Surgery |
| <b>Primary Subject Heading</b>: | Surgery                                                                                                                                                                                                                                                                                                                                                                                                                                                                                                                                                                                                                                                                                                                                                 |
| Secondary Subject Heading:      | Medical education and training                                                                                                                                                                                                                                                                                                                                                                                                                                                                                                                                                                                                                                                                                                                          |
| Keywords:                       | SURGERY, Risk management < HEALTH SERVICES ADMINISTRATION & MANAGEMENT, Transplant surgery < SURGERY, Quality in health care < HEALTH SERVICES ADMINISTRATION & MANAGEMENT                                                                                                                                                                                                                                                                                                                                                                                                                                                                                                                                                                              |
|                                 |                                                                                                                                                                                                                                                                                                                                                                                                                                                                                                                                                                                                                                                                                                                                                         |

SCHOLARONE™  
Manuscripts

1  
2  
3  
4 ***Surgical quality in organ procurement during day and night; an***  
5  
6 ***analysis of quality forms***  
7

8  
9 *Jacob de Boer MD<sup>1, 2,3\*</sup>, Koen van der Bogt MD PhD<sup>2,3,4\*</sup>, Hein Putter PhD<sup>5</sup>, Kirsten Ooms-de*  
10  
11 *Vries MSc<sup>1</sup>, Bernadette Haase-Kromwijk MSc<sup>1</sup>, Robert Pol MD PhD<sup>6</sup>, Jeroen de Jonge MD*  
12  
13 *PhD<sup>7</sup>, Kees Dejong MD PhD<sup>8</sup>, Mijntje Nijboer MD PhD<sup>2</sup>, Daan van der Vliet MD PhD<sup>9</sup>, Dries*  
14  
15 *Braat MD PhD<sup>2</sup>.*  
16

17  
18 \* Both authors have contributed equally  
19  
20  
21  
22

23 **Affiliations**

24 *Dutch Transplant Foundation<sup>1</sup>;*

25 *Department of Surgery, Division of Transplantation<sup>2</sup>; Department of Medical Statistics<sup>5</sup>, Leiden*

26 *University Medical Center, Leiden University;*

27 *Fit to Perform Study Group, [www.ftop.eu](http://www.ftop.eu)<sup>3</sup>;*

28 *Haaglanden Medical Center The Hague Dept of Surgery<sup>4</sup>;*

29 *University Medical Center Groningen Dept of Surgery<sup>6</sup>;*

30 *Erasmus Medical Center Rotterdam Dept of Surgery<sup>7</sup>;*

31 *Maastricht University Medical Center Dept of Surgery<sup>8</sup>;*

32 *Radboud University Nijmegen Medical Center Dept of Surgery<sup>9</sup>*  
33  
34  
35  
36  
37  
38  
39  
40  
41  
42  
43  
44  
45  
46

47 **Corresponding author:**

48 J.D. de Boer MD, Leiden University Medical Center, Dept. of Surgery. Albinusdreef 2, 2333 ZA

49 Leiden, The Netherlands. E-mail: [j.d.de\\_boer@lumc.nl](mailto:j.d.de_boer@lumc.nl). Reprints will not be available from the

50  
51  
52  
53  
54 authors.  
55  
56  
57  
58  
59  
60

1  
2  
3 **Running title:** Surgical quality and time of procurement  
4  
5  
6  
7  
8  
9  
10  
11  
12  
13  
14  
15  
16  
17  
18  
19  
20  
21  
22  
23  
24  
25  
26  
27  
28  
29  
30  
31  
32  
33  
34  
35  
36  
37  
38  
39  
40  
41  
42  
43  
44  
45  
46  
47  
48  
49  
50  
51  
52  
53  
54  
55  
56  
57  
58  
59  
60

For peer review only

1  
2  
3 **Abbreviations:**  
4

5 DCD, Donor after determination of circulatory death  
6

7 DBD, Donor after determination of brain death  
8

9 QF, Quality form  
10  
11  
12  
13

14 **Words:** 2,438 words  
15  
16  
17  
18  
19  
20  
21  
22  
23  
24  
25  
26  
27  
28  
29  
30  
31  
32  
33  
34  
35  
36  
37  
38  
39  
40  
41  
42  
43  
44  
45  
46  
47  
48  
49  
50  
51  
52  
53  
54  
55  
56  
57  
58  
59  
60

For peer review only

## Abstract (250 words)

### Objectives

To analyse a potential association between surgical quality and time of day.

### Design

A retrospective analysis of complete sets of quality forms filled out by the procuring and accepting surgeon on organs from deceased donors.

### Setting

Procurement procedures in the Netherlands are organized per region. All procedures are performed by an independent, dedicated procurement team that is associated with an academic medical center in the region.

### Participants

In 18 months' time, 771 organs were accepted and procured in The Netherlands. Of these, 17 organs were declined before transport and therefore excluded. For the remaining 754 organs, 591 (78%) sets of forms were completed (procurement and transplantation). Baseline characteristics were comparable in both day- and evening/night-time with the exception of height ( $p=0.003$ ).

### Primary outcome measure

All complete sets of quality forms were retrospectively analyzed for the primary outcome, procurement related surgical injury. Organs were categorized based on the starting time of the procurement in either day- (8AM–5PM) or evening/night-time (5PM–8AM).

### Results:

Out of 591 procured organs, 129 organs (22%) were procured during daytime and 462 organs (78%) during evening/night-time. The incidence of surgical injury was significantly lower during

1  
2  
3 daytime; 22 organs (17%) compared to 126 organs (27%) procured during evening/night-time  
4  
5 (p=0.016). This association persists when adjusted for confounders.  
6  
7

### 8 **Conclusions:**

9  
10 This study shows an increased incidence of procurement related surgical injury in  
11  
12 evening/night-time procedures as compared to daytime. Time of day might (in)directly influence  
13  
14 surgical performance and should be considered a potential risk factor for injury in organ  
15  
16 procurement procedures.  
17  
18  
19  
20  
21  
22

### 23 **Strengths and limitations**

- 24  
25
- 26 • Quality of procurement is evaluated by two specialists; once by the procuring and once  
27 by the accepting surgeon. (+)
  - 28
  - 29 • All procedures are performed by a dedicated, certified procurement team. This ensures a  
30 high standard of procurement quality. (+)
  - 31
  - 32 • Selection bias in the timing of procurements is minimal because the planning is mainly  
33 logistical rather than medical. (+)
  - 34
  - 35 • Injury is evaluated in a categorical way (yes/no) to analyze surgical performance in a  
36 broad sense. It avoids a loss of detailed information but limits a sub analysis on injuries  
37 leading to discarding organs.
  - 38
  - 39 • Conclusions may be limited by the number of procured organs. (-)
  - 40
  - 41
  - 42
  - 43
  - 44
  - 45
  - 46
  - 47
  - 48
  - 49
  - 50
  - 51
  - 52
  - 53
  - 54
  - 55
  - 56
  - 57
  - 58
  - 59
  - 60

## Introduction

Nights shifts have been shown to pose a higher risk for errors and self-injuries in several medical settings<sup>1-4</sup>. A negative effect of nights shifts might be caused by factors associated with fatigue and circadian rhythm<sup>5</sup> and could also affect surgical performance. The potential relation between timing of procedures and surgical performance, is however not clear. Studies have reported conflicting results<sup>6-10</sup> and timing of procedures might therefore affect patients' safety. The discussion on the topic, has contributed to reforms in working hours for surgical residents in the US, as well as in Europe.

The lack of evidence for a causative relationship between fatigue related factors and inferior performance in surgery is interesting considering the extensive amount of evidence in other fields<sup>11,12</sup>. Although it might hold true that surgical performance is not affected by fatigue or time of day, it could also be a consequence of an insufficiently sensitive measurement of technical proficiency. To measure surgical performance, a negative clinical outcome in patients would be the most obvious endpoint. This has however some limitations. A clinical endpoint might lead to a loss of detailed information because only severe intra-operative injuries are likely recognized for their clinical impact while minor injuries might be missed. Secondly, it is difficult to relate a specific surgical injury to a particular negative outcome in a patient, because not all intra-operative injuries are noticed and negative outcomes are multifactorial and complex. A potential (minor) effect of time of day on surgical performance might therefore not be noticed when solely focussing on clinical outcome measures.

The Dutch digital feedback system on the quality of organ procurement offers an opportunity to analyse surgical performance in detail. We have previously analysed this dataset on procurement related surgical injuries and found a high incidence of non-critical injuries. We did not find a



1  
2  
3 significant difference between the non-critically injured and intact organs for one year graft  
4 survival<sup>13</sup>. In this study, surgical injury is considered as a sensitive proxy of surgical  
5 performance. We hypothesize that a relationship is present between surgical performance and  
6  
7  
8  
9  
10 time of day.  
11  
12  
13  
14  
15  
16  
17  
18  
19  
20  
21  
22  
23  
24  
25  
26  
27  
28  
29  
30  
31  
32  
33  
34  
35  
36  
37  
38  
39  
40  
41  
42  
43  
44  
45  
46  
47  
48  
49  
50  
51  
52  
53  
54  
55  
56  
57  
58  
59  
60

## Methods

### *Data*

We obtained data from the Dutch Transplant Foundation on quality forms filled out from March 2012 until September 2013. It comprises two forms on each individual abdominal organ that is procured and accepted in The Netherlands. One form is filled out by the procuring surgeon after procurement and concurred or commented on by the accepting surgeon in the second form.

Detailed information is registered on packaging, perfusion (time/volume/fluid), anatomy and possible injury of vessels or organs. In case of a discrepancy between the procuring and accepting surgeons, remarks of the accepting surgeon were considered leading. Pancreata procured for islet-isolation and organs that were declined before transportation to the accepting center were excluded. No ethical statement was required according to national ethical guidelines. Data are available upon request at the Dutch Transplant Foundation. Permission for this analysis was granted by the national competent authority, the Dutch Transplant Foundation, on April 6<sup>th</sup>, 2017.

### *Patient and public involvement*

Patients were not involved in the development of the research question or in the design of the study.

### *Statistical analysis*

We accepted the time of cross-clamping the aorta and start of the cold perfusion as starting time of the procedure. For donation after circulatory determination of death (DCD) this is almost at the same time, but for donation after determination of brain death (DBD) this usually is 1 – 2

1  
2  
3 hours after skin incision. Vascular anatomy of organs was considered to be 'normal' for kidneys  
4  
5 when a single artery and vein were observed. For livers and pancreata from the same donor,  
6  
7 anatomy was considered normal according to the variable normal arterial anatomy (y/n) in the  
8  
9 liver quality form. In case information on the vascular anatomy was missing it was considered to  
10  
11 be normal (n=3, 0.5%). All organs were categorized in two groups; daytime (when procured  
12  
13 between 8AM and 5PM) or evening/night-time (when procured between 5PM and 8AM). The  
14  
15 incidence of injury was dichotomized (yes/no) and compared between both groups using  
16  
17 univariate logistic regression with time of day as sole covariate. The analyses were adjusted for  
18  
19 potential confounders, statistical significant in univariate analyses, and for known confounders  
20  
21 reported in the literature. These factors include body mass index (BMI) and donor type (DCD or  
22  
23 DBD)<sup>13-16</sup>.

24  
25  
26  
27  
28  
29  
30  
31 The relationship between injury and starting time of the procedure was visualized as a log odds  
32  
33 ratio on a continuous 24 hours' scale by using splines regression. To correct for a possible  
34  
35 correlation of injury within donor procedures, sandwich estimators of the standard errors were  
36  
37 used. A p-value of <0.05 was considered statistically significant and analyses were performed  
38  
39 with SPSS version 22.0 and R version 2.3.3.  
40  
41  
42  
43  
44  
45  
46  
47  
48  
49  
50  
51  
52  
53  
54  
55  
56  
57  
58  
59  
60

## Results

During the study period, 771 organs were accepted for transplantation, of which 17 (5 livers, 8 pancreata and 4 kidneys) were declined during procurement and subsequently not transported. For all 754 accepted and transported organs, 591 forms were completed (591/754, 78%) on 133 livers (23%), 38 pancreata (6%) and 420 kidneys (71%). Response rates per organ were respectively 87%, 90% and 75%. There were 148 (148/591, 25%) organs with reported injuries; 36 livers (36/133, 27%), 10 pancreata (10/38, 26%) and 102 kidneys (102/420, 24%). Of all injured organs, 12 (2%) were discarded because of this surgical injury; 1/133 (0.8%) liver, 5/38 (13%) pancreata and 6/420 (1.4%) kidneys ( $p < 0.001$ ).

### *Day and night-time operating hours*

With the exception of donor height ( $p = 0.003$ ) organs were comparable in demographical characteristics in the daytime and evening/night-time groups in univariate analysis as shown in Table 1.

**Table 1.** Demographics of the study population (n=591). Only height is different between the two groups (p=0.003).

|               | Daytime (8AM-5PM) |        |           | Evening- and nighttime<br>(5PM-8AM), n=462 |        |               | p-value      |
|---------------|-------------------|--------|-----------|--------------------------------------------|--------|---------------|--------------|
|               | n=129             |        |           | n=462                                      |        |               |              |
|               | Mean<br>(SD)      | Median | Range     | Mean<br>(SD)                               | Median | Range         |              |
| <b>Age</b>    | 51.8<br>(15.3)    | 55     | 14-76     | 52.2<br>(15.6)                             | 55     | 10-78         | 0.772        |
| <b>Height</b> | 177.4<br>(7.1)    | 180    | 161-198   | 174.8<br>(9.4)                             | 175    | 140-200       | <b>0.003</b> |
| <b>Weight</b> | 76.6<br>(13.4)    | 78     | 52-120    | 76.6<br>(15.1)                             | 77     | 35-150        | 0.996        |
| <b>BMI</b>    | 24.3<br>(3.6)     | 24.0   | 17.6-34.7 | 25.0<br>(4.1)                              | 24.7   | 12.5-<br>46.3 | 0.080        |
|               | <b>n (%)</b>      |        |           | <b>n (%)</b>                               |        |               |              |
| <b>Sex</b>    |                   |        |           |                                            |        |               |              |
| Male          | 75                |        |           | 256 (55)                                   |        |               |              |

|                     |            |  |          |  |       |
|---------------------|------------|--|----------|--|-------|
|                     | (58)       |  |          |  |       |
| Female              | 54<br>(42) |  | 206 (45) |  | 0.581 |
| <b>Donortype</b>    |            |  |          |  |       |
| DBD                 | 69<br>(53) |  | 210 (45) |  |       |
| DCD                 | 60<br>(47) |  | 252 (55) |  | 0.106 |
| Aberrant<br>anatomy | 32<br>(17) |  | 129 (28) |  | 0.458 |

Volume related regional effects that may also impact the risk of surgical injury<sup>13</sup>, were not significantly different between both groups (data not shown). During daytime, 129 of 591 organs (22%) were procured and 462 organs (78%) were procured during evening/night-time. There were fewer organ injuries during daytime procurements compared to evening/night time, respectively; 22 organs (17%) and 126 organs (27%) ( $p=0.016$ ). In the full adjusted model evening/night-time procedures remained an independent factor associated with injury ( $p=0.029$ ). Of all critically injured organs, 7 out of 12 (60%) were procured in evening/night-time as compared to 5 out of 12 organs in daytime. The distribution of critical injuries (table S1) seems therefore to correspond with the distribution of procurements (figure S1).

1  
2  
3  
4  
5  
6 *Circadian points*

7  
8 Figure 1 shows the increased risk of injury for procedures that start in evening/night-time. The  
9  
10 highest risk of organ injury was for procedures starting around 9PM, the lowest risk for  
11  
12 procedures starting around 12PM (noon).  
13  
14  
15  
16  
17  
18  
19  
20  
21  
22  
23  
24  
25  
26  
27  
28  
29  
30  
31  
32  
33  
34  
35  
36  
37  
38  
39  
40  
41  
42  
43  
44  
45  
46  
47  
48  
49  
50  
51  
52  
53  
54  
55  
56  
57  
58  
59  
60

## Discussion

This study shows a relationship between surgical performance and the starting time of the procurement procedure. A higher incidence of surgical injury is observed during evening/night-time procedures as compared to daytime procedures. This association persists when adjusted for important confounders.

The relation between surgical performance and timing of surgical procedures is often highly confounded. Patients have more complicated and/or acute problems during the night<sup>17</sup>. Also, access to imaging and laboratory testing as well as specialized operating room (OR) nurses and anesthesiologists might be less available during night-time<sup>13</sup>. The study population of this study, abdominal organs from deceased donors, eliminates several of these confounders. Most procedures can generally be scheduled within 6-24 hours regardless of the cause of brain death because these patients are usually hemodynamically stable. A higher number of procurement procedures during evening/night-time therefore seems to reflect issues with OR availability during the day rather than an abundance of emergency procedures. Secondly, abdominal organ procurement is well organized in The Netherlands; each sub region has a 24/7 availability of a self-supporting, certified organ procurement team. Such a team includes, both during daytime and evening/night-time procedures, two dedicated nurses, a dedicated anesthesiologist and two surgeons, of who at least one is certified for procurement procedures according to the national guidelines. This includes the ESOT procurement e-course, a minimum of ten multi-organ procurement procedures followed by an examination by a non-regional procurement surgeon. The certified surgeons are then members of the regional dedicated procurement teams that operate on a 24h basis and are not involved in other clinical activities while on duty. The extensive training to become certified and the absence of other clinical activities when on call,



1  
2  
3 ensure a high quality of organ procurement and eliminates a major variance in operating staff. In  
4  
5 addition, differences in hospital facilities (local vs. academical) should be minimal because the  
6  
7 teams are self-reliant and bring own standard supplies for the procedure. In our opinion, this  
8  
9 offers a unique setting.

10  
11  
12 Another strength of this study is the very small difference in baseline characteristics of the day-  
13  
14 and evening/night-time groups. Donor characteristics described to be associated with  
15  
16 procurement related injury in kidney<sup>14</sup>, liver<sup>16</sup> and pancreas<sup>15</sup> procurement procedures (such as:  
17  
18 donor age, DCD donor type, BMI, aberrant anatomy and male gender) were not significantly  
19  
20 different. Only donor height was different between both groups and so far this factor has not  
21  
22 been described to influence the risk of organ injury. The similarity between both groups is likely  
23  
24 associated with the planning of procedures; independent of donor characteristics and solely  
25  
26 dependent of OR availability. Other relevant variables can therefore be assumed to be equal in  
27  
28 both groups since they do not affect or are not affected by the starting time of procedures. This  
29  
30 includes non-measured donor associated characteristics, for example previous abdominal  
31  
32 surgery, as well as potential differences in reporting injuries when organs were procured by  
33  
34 surgeons from the same transplant unit as the transplanting team. Factors that might have been  
35  
36 different and might have influenced our results, include volume related regional effects as  
37  
38 previously described<sup>13</sup>. The ratio between regions for day- and evening/night-time procedures  
39  
40 was however not different (data not shown).  
41  
42  
43  
44  
45  
46  
47

48 In this study, we evaluated all surgical injury in a strict dichotomous way (yes/no) to analyze  
49  
50 surgical performance in a broad sense and to avoid a loss of detailed information. In further  
51  
52 studies, it could be of relevance to further specify the definition, type and impact of injury. In the  
53  
54  
55  
56  
57  
58  
59

1  
2  
3 current data for example, the number of critical injuries –leading to discarding of the organ-  
4 (n=12) are insufficient for an adequate comparison in day- and evening/night-time groups.  
5  
6 A limitation of this study is the response rate for complete sets of forms of 80%; a higher  
7  
8 response rate might have led to a higher reported number of (critical) injuries. Although the  
9  
10 response rate could have been better, it is to be noted, that the current response rate concerns  
11  
12 organs on which two forms are digitally filled out by two independent surgeons. This two-way  
13  
14 registration can be considered to be precise and objective.  
15  
16  
17  
18  
19

20 Our results are in accordance with (non-surgical) medical studies that report a negative relation  
21  
22 between evening/night-time or fatigue related factors and performance; a higher rate of self-  
23  
24 injuries among residents<sup>3</sup> and a decreased proficiency in surgical simulations after night shifts<sup>8</sup>.  
25  
26 These results are conflicting with large surgical database studies that show no difference in  
27  
28 conversion rates during cholecystectomy or outcome in patients like the occurrence of serious  
29  
30 adverse events<sup>6,18</sup>. Rothschild *et al.* on the other hand, found an increased rate of complications  
31  
32 during post night-time surgical procedures performed by physicians with sleep opportunities of  
33  
34 less than 6 hours<sup>10</sup>. A study on liver transplantation, found that surgical procedures during night-  
35  
36 time took longer and were associated with a higher risk of early death, although without any  
37  
38 effect on peri-operative complications or long-term survival<sup>19</sup>. Also in kidney transplantation,  
39  
40 more peri-operative complications<sup>20</sup> but less technical graft failure<sup>21</sup> were seen in night-time  
41  
42 procedures. The latter did not take into account a difference in surgical experience between day-  
43  
44 and night-time procedures; night-time procedures are rather performed by consulting surgeons as  
45  
46 compared to daytime procedures that are usually performed by (supervised) surgical residents. In  
47  
48 the current study however, all procedures were performed by the same group of dedicated  
49  
50 surgeons and teams.  
51  
52  
53  
54  
55  
56  
57  
58  
59  
60

1  
2  
3 These studies seem to report contradictory findings between short term or non-patient outcomes  
4 on the one hand and long-term outcome in patients. This observation is reflected in our data; we  
5 noticed a higher incidence of surgical injuries during night-time (this study) but no difference in  
6 one year graft survival between injured and intact organs in a previous analysis of the same  
7 cohort<sup>13</sup>. This indicates that the pathway leading to a negative outcome in surgical patients is  
8 complex and multi-factorial and only the most severe surgical injuries might result in clinically  
9 measurable negative outcome. To find a significant difference in outcome in patients that can be  
10 related to the timing of procedures or ‘fitness’ of surgeons, higher numbers are probably needed.  
11 This study can therefore only assess (technical) surgical performance.  
12  
13  
14  
15  
16  
17  
18  
19  
20  
21  
22  
23  
24

25 The increased injury rates during evening/night-time operating hours may indicate that surgical  
26 performance is affected by time of day. The etiology of this association is however not yet clear.  
27 The negative effect of evening/night-time procedures suggests an effect of fatigue related factors.  
28 Fatigue was however not measured in this study and should theoretically play a smaller role  
29 because procurement teams can rest between procedures and do not participate in other clinical  
30 activities when on call. Other mechanisms might however contribute; the surgical injury pattern  
31 in this study shows, for example, a remarkable resemblance with circadian rhythm and  
32 associated biological hormone levels as observed in chronobiology<sup>22</sup>. To further identify the  
33 mechanism behind the higher injury rate during evening/night-time, it will be essential to  
34 objectively measure the surgeon’s fitness before and after procurement. Current research on the  
35 validation and clinical application of such a “Fit to Perform” test is ongoing<sup>23</sup>. It might give an  
36 objective tool to evaluate the relation between the fitness of a surgeon and his surgical  
37 performance.  
38  
39  
40  
41  
42  
43  
44  
45  
46  
47  
48  
49  
50  
51  
52  
53  
54  
55  
56  
57  
58  
59  
60

1  
2  
3 We believe this study shows, that evening/night-time procedures might present a suboptimal  
4 setting for organ procurement. Although the causal pathway is not yet clear, our results do  
5 suggest that time of day should be taken into account to optimize the quality of organ  
6 procurement. Theoretically, transplantations in the evening/night-time may also be related to a  
7 higher risk of complications. If so, this poses a dilemma because the timing of the procurement  
8 also affects the timing of the transplantation. Although a higher risk of complications in  
9 transplantations during the evening/night-time has not been described, it seems best to perform  
10 the procurement early in the morning. In such a way, it is still possible to subsequently start the  
11 transplantation operation that same afternoon. Timing may even be of relevance for other  
12 surgical procedures. This would mean that, in the absence of acute pathology, surgeries should  
13 be preferably performed during daytime.  
14  
15  
16  
17  
18  
19  
20  
21  
22  
23  
24  
25  
26  
27  
28  
29  
30

### 31 **Conclusion**

32  
33  
34 This study shows an increased incidence of surgical injury in organ procurement procedures  
35 during evening/night-time, as compared to daytime. Time of day might (in)directly influence  
36 surgical performance and should be considered a potential risk factor for injury in organ  
37 procurements.  
38  
39  
40  
41  
42  
43  
44  
45  
46  
47  
48  
49  
50  
51  
52  
53  
54  
55  
56  
57  
58  
59  
60

1  
2  
3  
4  
5  
6  
7  
8  
9  
10  
11  
12  
13  
14  
15  
16  
17  
18  
19  
20  
21  
22  
23  
24  
25  
26  
27  
28  
29  
30  
31  
32  
33  
34  
35  
36  
37  
38  
39  
40  
41  
42  
43  
44  
45  
46  
47  
48  
49  
50  
51  
52  
53  
54  
55  
56  
57  
58  
59  
60

**Acknowledgements**

The authors would like to gratefully acknowledge Cynthia Konijn, Dilesh Kishoendajal and Steffen de Groot (Dutch Organ Transplant Registry) for their efforts in collecting the data.

For peer review only

1  
2  
3 **Figure legends:**  
4

5  
6 **Figure 1.** The relationship between starting time of the cold perfusion of the aorta and risk of  
7  
8 injury.  
9

10  
11  
12 **Supplementary files:**  
13

14  
15 **Figure S1.** Number of procured organs per time of day (h)  
16

17  
18 **Table S1.** Time of the start of the procurement procedure(h) of injured organs that were  
19  
20 discarded for transplantation (n=12).  
21  
22

**Author contributions:**

Dr. De Boer, Dr. Van der Bogt and Dr. Braat hypothesized that a relationship may be present between time of day and the incidence of surgical injury. Dr. Van der Bogt is involved in the Fit to Perform trial currently performed in The Netherlands. Data on procured organs are provided by all six transplanting centers in the Netherlands to the Dutch Transplant Foundation. Permission to use these was granted by delegates from all centers; Dr. Pol (Groningen), Dr. De Jonge (Rotterdam), Dr. Dejong (Maastricht), Dr. Nijboer (Leiden) and Dr. Van der Vliet (Nijmegen). Data were then obtained via the Dutch Transplant Foundation where Mrs. Ooms-De Vries and Mrs. Haase-Kromwijk were involved. Data were analysed and statistical analysis was performed and interpreted by Dr. De Boer, Dr. Van der Bogt, Dr. Braat and Prof. Putter of the Statistical Department. The manuscript was then drafted by Dr. De Boer, Dr. Van der Bogt, Dr. Braat and Prof. Putter. The draft manuscript was critically revised by all involved.

**Funding and Competing Interests Statement:**

This research received no specific grant from any funding agency in the public, commercial or not-for-profit sectors. There are no conflicts of interest.

**Data sharing agreement**

Data are available upon request at the Dutch Transplant Foundation. Permission for this analysis was granted by the national competent authority, the Dutch Transplant Foundation, on April 6<sup>th</sup>, 2017.

**References:**

1. Landrigan C, Rothschild J, Cronin J, et al. Effect of reducing interns' work hours on serious medical errors in intensive care units. *N Engl J Med*. 2004;351(18):1838-1848.
2. Rodriguez-Jareño MC, Demou E, Vargas-Prada S, et al. European Working Time Directive and doctors' health: a systematic review of the available epidemiological evidence. *BMJ Open*. 2014;4(7):e004916. doi:10.1136/bmjopen-2014-004916.
3. Ayas NT, Barger LK, Cade BE, et al. Extended work duration and the risk of self-reported percutaneous injuries in interns. *JAMA*. 2006;296(9):1055-1062. doi:10.1097/01.AOG.0000252305.52668.c0.
4. Arnedt JT, Owens J, Crouch M, Stahl J, Carskadon M a. Neurobehavioral performance of residents after heavy night call vs after alcohol ingestion. *JAMA*. 2005;294(9):1025-1033. doi:10.1097/01.sa.0000185353.45824.bc.
5. Griffith C, Mahadevan S. Sleep-deprivation effect on human performance: a meta-analysis approach. *J Sleep Res Sleep Med*. 2006;19(4):318-326. doi:10.1115/1.802442.paper185.
6. Vinden C, Nash DM, Rangrej J, et al. Complications of daytime elective laparoscopic cholecystectomies performed by surgeons who operated the night before. *Jama*. 2013;310(17):1837-1841. doi:10.1001/jama.2013.280372.
7. Grantcharov TP, Bardram L, Funch-Jensen P, Rosenberg J. Laparoscopic performance after one night on call in a surgical department: prospective study. *BMJ*. 2001;323(7323):1222-1223. doi:10.1136/bmj.323.7323.1222.
8. Brandenberger J, Kahol K, Feinstein AJ, Ashby A, Smith M, Ferrara JJ. Effects of duty hours and time of day on surgery resident proficiency. *Am J Surg*. 2010;200(6):814-819. doi:10.1016/j.amjsurg.2010.06.009.



- 1  
2  
3 9. Wiesner R, Edwards E, Freeman R, et al. Model for end-stage liver disease (MELD) and  
4 allocation of donor livers. *Gastroenterology*. 2003;124(1):91-96.  
5  
6 doi:10.1053/gast.2003.50016.  
7
- 8  
9  
10 10. Rothschild JM, Keohane CA, Rogers S, et al. Risks of complications by attending  
11 physicians after performing nighttime procedures. *JAMA - J Am Med Assoc*.  
12  
13 2009;302(14):1565-1572. doi:10.1001/jama.2009.1423.  
14  
15
- 16  
17 11. Connor J, Norton R, Ameratunga S, et al. Driver sleepiness and risk of serious injury to  
18 car occupants: population based case control study. *BMJ*. 2002;324(7346):1125.  
19  
20 doi:10.1136/bmj.324.7346.1125.  
21  
22
- 23  
24 12. Horne JA, Reyner LA. Sleep related vehicle accidents. *Bmj*. 1995;310(6979):565-567.  
25  
26 doi:10.1136/bmj.310.6979.565.  
27
- 28  
29 13. de Boer JD, Kopp WH, Ooms K, et al. Abdominal organ procurement in the Netherlands  
30 – an analysis of quality and clinical impact. *Transpl Int*. 2017;30(3).  
31  
32 doi:10.1111/tri.12906.  
33  
34
- 35  
36 14. Ausania F, White SA, Pocock P, Manas DM. Kidney damage during organ recovery in  
37 donation after circulatory death donors: data from UK National Transplant Database.  
38  
39 *AmJTransplant*. 2012;12(4):932-936. doi:10.1111/j.1600-6143.2011.03882.x [doi].  
40  
41
- 42  
43 15. Ausania F, Drage M, Manas D, Callaghan CJ. A registry analysis of damage to the  
44 deceased donor pancreas during procurement. *Am J Transpl*. 2015;15(11):2955-2962.  
45  
46 doi:10.1111/ajt.13419.  
47  
48
- 49  
50 16. Ausania F, White SA, Coates R, Hulme W, Manas DM. Liver damage during organ donor  
51 procurement in donation after circulatory death compared with donation after brain death.  
52  
53 *BrJSurg*. 2013;100(3):381-386. doi:10.1002/bjs.9009 [doi].  
54  
55  
56  
57  
58  
59

- 1  
2  
3  
4  
5  
6  
7  
8  
9  
10  
11  
12  
13  
14  
15  
16  
17  
18  
19  
20  
21  
22  
23  
24  
25  
26  
27  
28  
29  
30  
31  
32  
33  
34  
35  
36  
37  
38  
39  
40  
41  
42  
43  
44  
45  
46  
47  
48  
49  
50  
51  
52  
53  
54  
55  
56  
57  
58  
59  
60
17. Anselmi L, Meacock R, Kristensen SR, Doran T, Sutton M. Arrival by ambulance explains variation in mortality by time of admission: Retrospective study of admissions to hospital following emergency department attendance in England. *BMJ Qual Saf*. 2017;26(8):613-621. doi:10.1136/bmjqs-2016-005680.
  18. Anand Govindarajan, M.D., David R. Urbach, M.D., Matthew Kumar, M.Sc., Qi Li, M.Sc., Brian J. Murray, M.D., David Juurlink, M.D., Ph.D., Erin Kennedy, M.D., Ph.D., Anna Gagliardi PD. Outcomes of Daytime Procedures Performed by Attending Surgeons after Night Work. *N Engl J Med* . 2015;373:845-853. doi:10.1056/NEJMsa1415994.
  19. Lonze BE, Parsikia A, Feyssa EL, et al. Operative start times and complications after liver transplantation. *Am J Transplant*. 2010;10(8):1842-1849. doi:10.1111/j.1600-6143.2010.03177.x.
  20. Fechner G, Pezold C, Hauser S, Gerhardt T, Müller SC. Kidney's Nightshift, Kidney's Nightmare? Comparison of Daylight and Nighttime Kidney Transplantation: Impact on Complications and Graft Survival. *Transplant Proc*. 2008;40(5):1341-1344. doi:10.1016/j.transproceed.2008.02.072.
  21. Özdemir DMD, Andries VB, Jagt MFP Van Der, Frank C, Rogier A. Nighttime kidney transplantation is associated with less pure technical graft failure. 2016:955-961. doi:10.1007/s00345-015-1679-0.
  22. Jasper I, Roenneberg T, Häußler A, Zierdt A, Marquardt C, Hermsdörfer J. Circadian Rhythm in Force Tracking and in Dual Task Costs. *Chronobiol Int*. 2010;27(3):653-673. doi:10.3109/07420521003663793.
  23. Huizinga CRH, de Kam ML, Stockmann HBAC, van Gerven JMA, Cohen AF, van der Bogt KEA. Evaluating Fitness to Perform in Surgical Residents after Night Shifts and

1  
2  
3  
4  
5  
6  
7  
8  
9  
10  
11  
12  
13  
14  
15  
16  
17  
18  
19  
20  
21  
22  
23  
24  
25  
26  
27  
28  
29  
30  
31  
32  
33  
34  
35  
36  
37  
38  
39  
40  
41  
42  
43  
44  
45  
46  
47  
48  
49  
50  
51  
52  
53  
54  
55  
56  
57  
58  
59  
60

Alcohol Intoxication: The development of a “Fit-to-Perform” test. *J Surg Educ.* 2018.  
doi:10.1016/j.jsurg.2018.01.010.

For peer review only

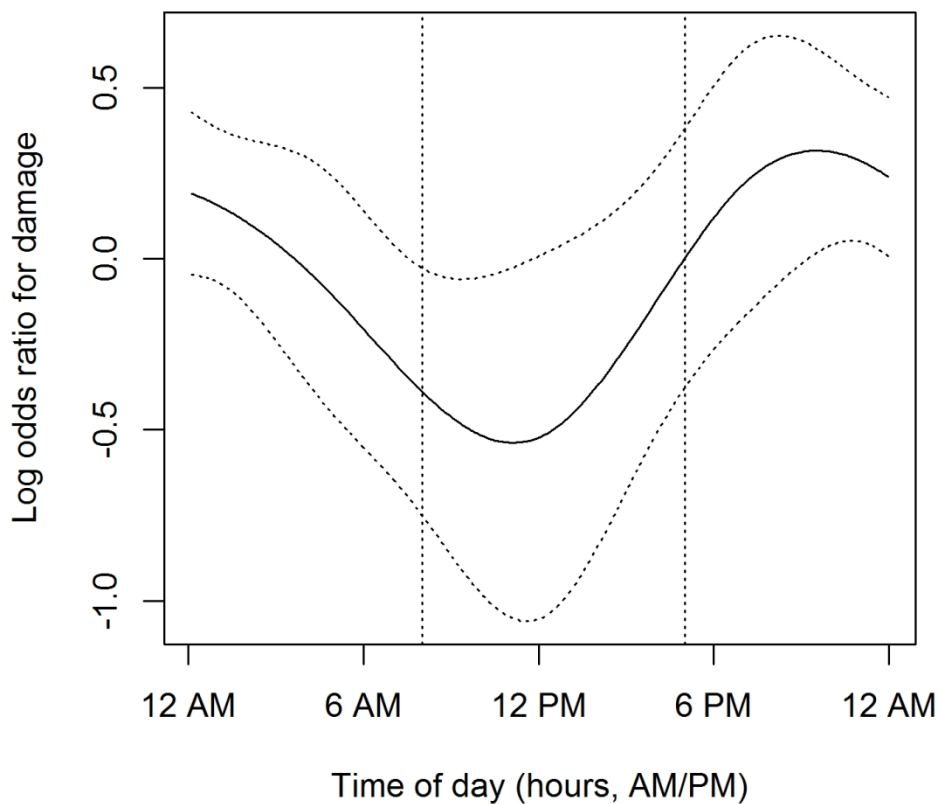

The relationship between starting time of the cold perfusion of the aorta and risk of injury.

127x127mm (300 x 300 DPI)

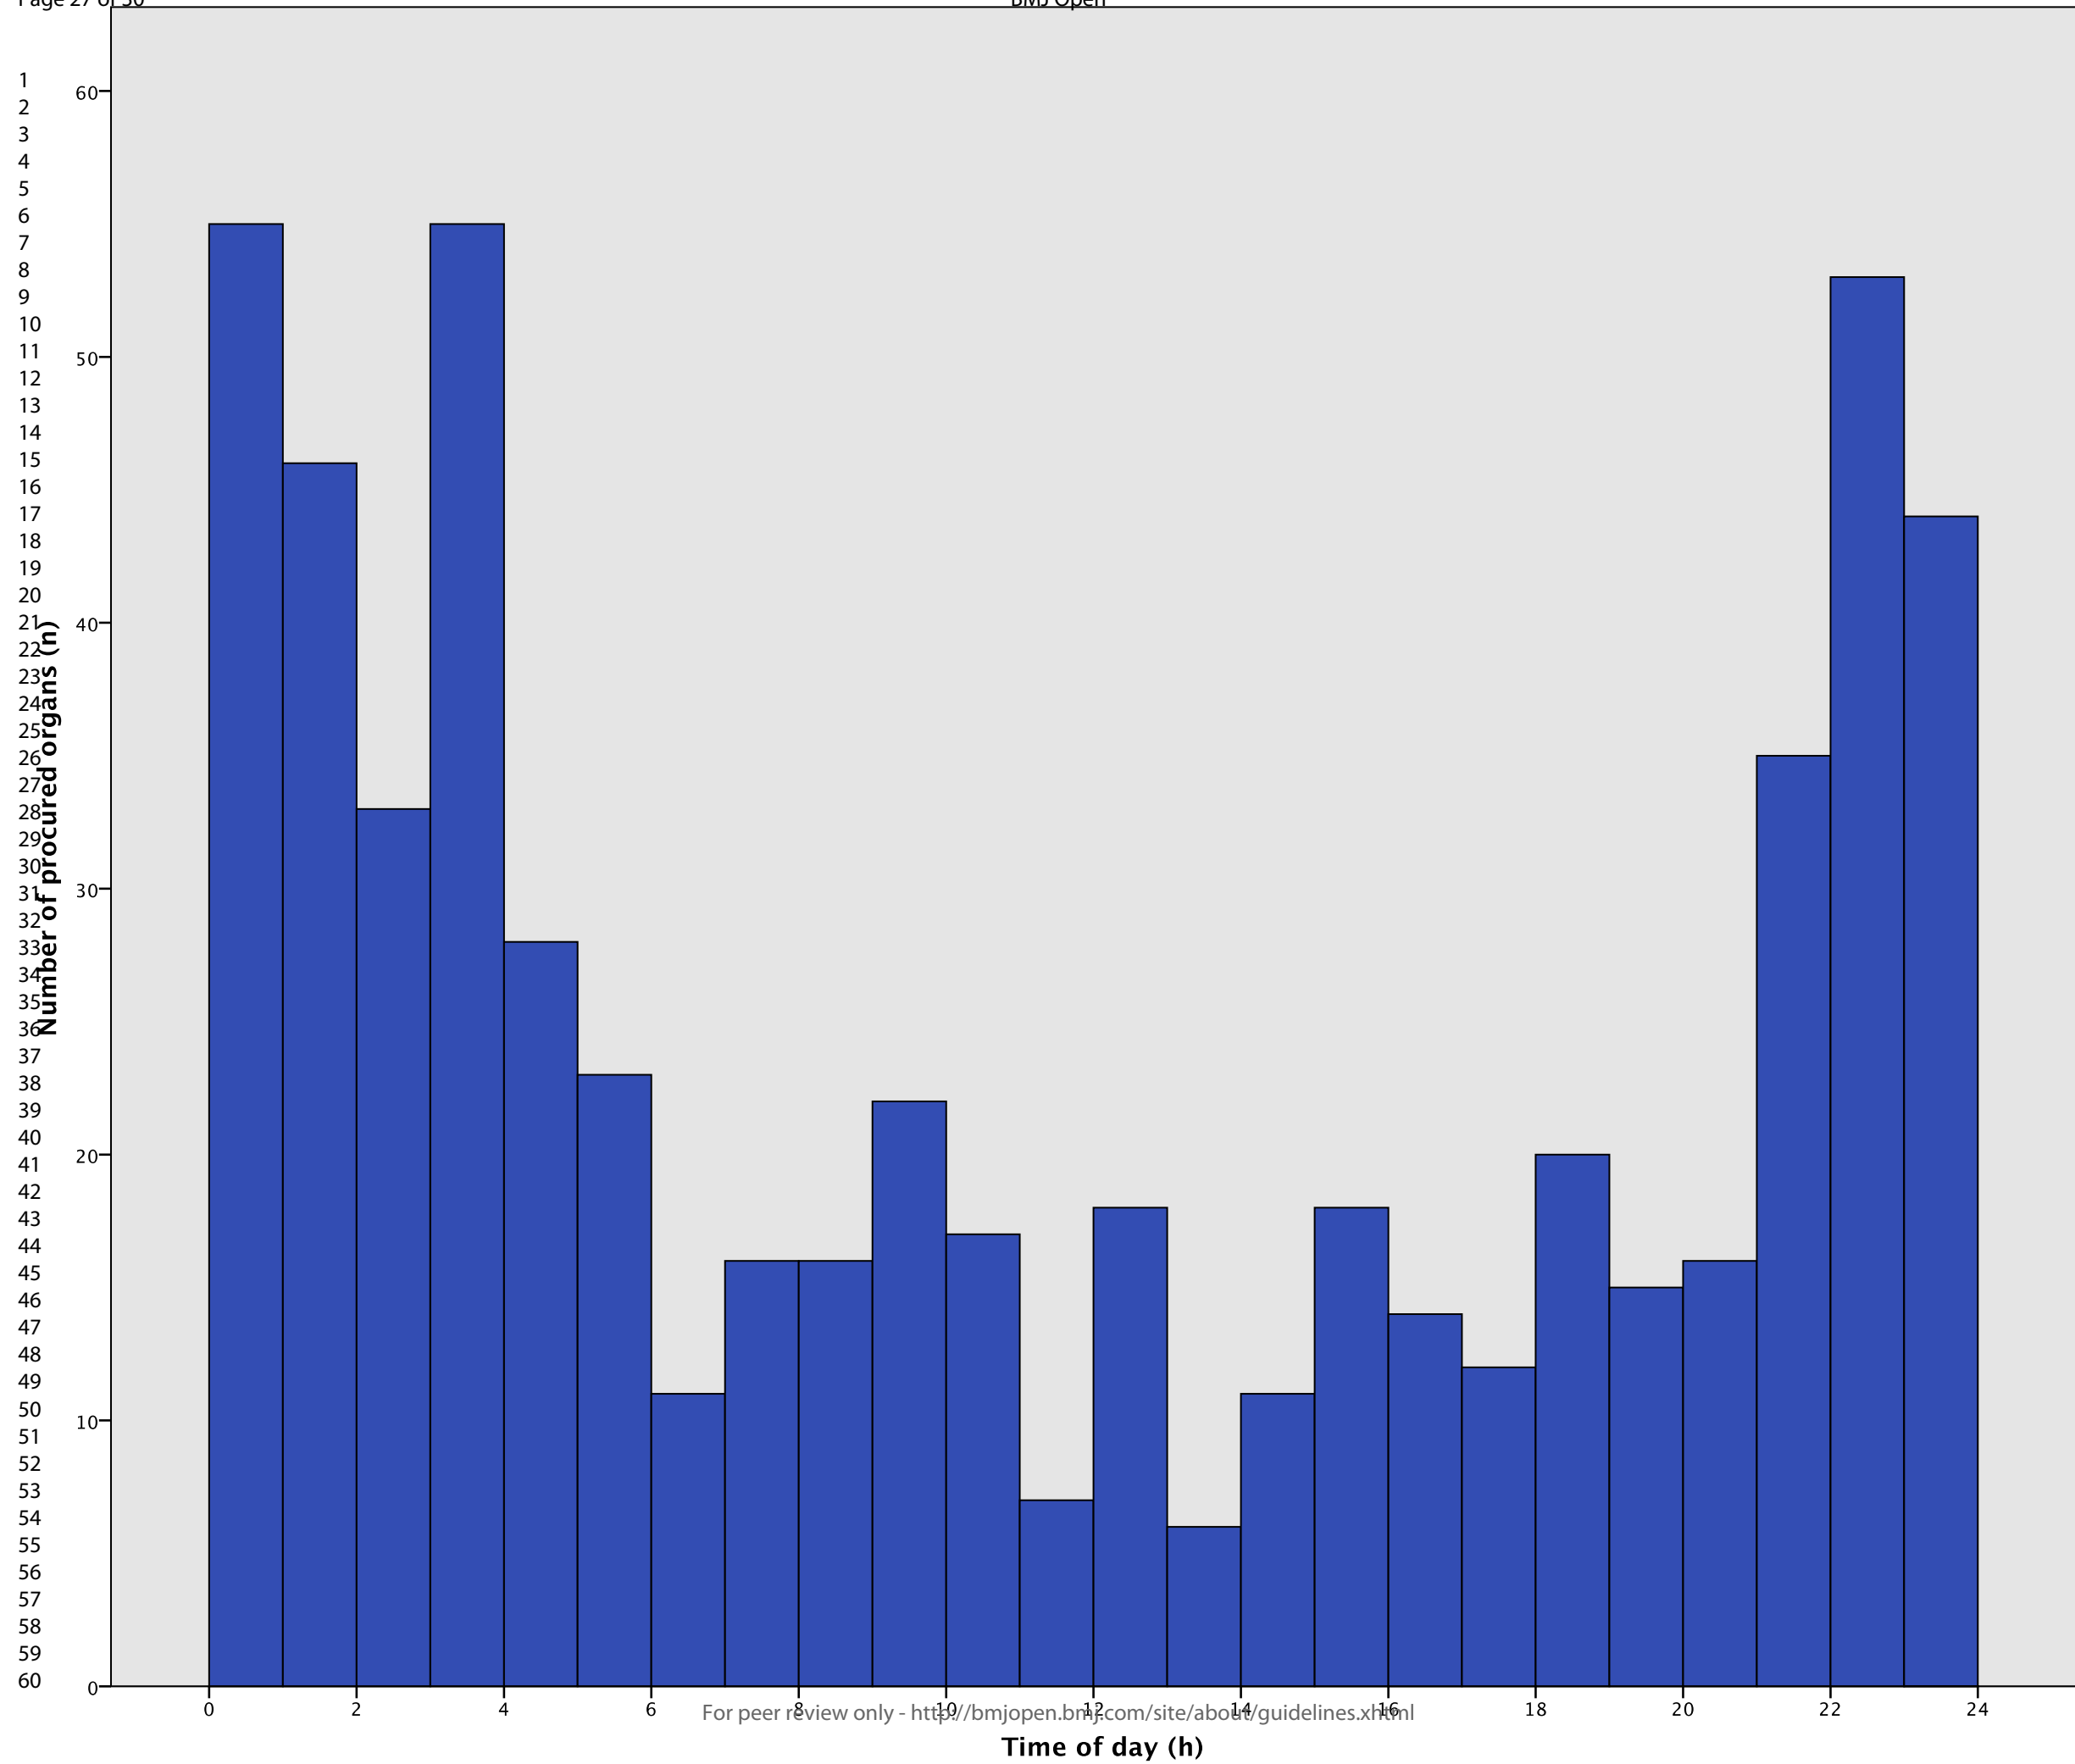

For peer review only - <http://bmjopen.bmj.com/site/about/guidelines.xhtml>

**Table S1**

| <b>Organ</b> | 1    | 2    | 3    | 4    | 5    | 6    | 7     | 8     | 9     | 10    | 11    | 12    |
|--------------|------|------|------|------|------|------|-------|-------|-------|-------|-------|-------|
| <b>Time</b>  | 1.1h | 2.4h | 3.0h | 3.0h | 3.0h | 4.3h | 12.4h | 14.3h | 15.2h | 15.2h | 15.2h | 22.5h |

For peer review only

**STROBE 2007 (v4) Statement—Checklist of items that should be included in reports of *cohort studies***

| Section/Topic             | Item # | Recommendation                                                                                                                                                                       | Reported on page # |
|---------------------------|--------|--------------------------------------------------------------------------------------------------------------------------------------------------------------------------------------|--------------------|
| Title and abstract        | 1      | (a) Indicate the study’s design with a commonly used term in the title or the abstract                                                                                               | Title page         |
|                           |        | (b) Provide in the abstract an informative and balanced summary of what was done and what was found                                                                                  | 1                  |
| <b>Introduction</b>       |        |                                                                                                                                                                                      |                    |
| Background/rationale      | 2      | Explain the scientific background and rationale for the investigation being reported                                                                                                 | 4-5                |
| Objectives                | 3      | State specific objectives, including any prespecified hypotheses                                                                                                                     | 1 and 5            |
| <b>Methods</b>            |        |                                                                                                                                                                                      |                    |
| Study design              | 4      | Present key elements of study design early in the paper                                                                                                                              | 6                  |
| Setting                   | 5      | Describe the setting, locations, and relevant dates, including periods of recruitment, exposure, follow-up, and data collection                                                      | 6                  |
| Participants              | 6      | (a) Give the eligibility criteria, and the sources and methods of selection of participants. Describe methods of follow-up                                                           | 6                  |
|                           |        | (b) For matched studies, give matching criteria and number of exposed and unexposed                                                                                                  | n/a                |
| Variables                 | 7      | Clearly define all outcomes, exposures, predictors, potential confounders, and effect modifiers. Give diagnostic criteria, if applicable                                             | 6                  |
| Data sources/ measurement | 8*     | For each variable of interest, give sources of data and details of methods of assessment (measurement). Describe comparability of assessment methods if there is more than one group | 6                  |
| Bias                      | 9      | Describe any efforts to address potential sources of bias                                                                                                                            | 10-11 and 12-13    |
| Study size                | 10     | Explain how the study size was arrived at                                                                                                                                            | 6                  |
| Quantitative variables    | 11     | Explain how quantitative variables were handled in the analyses. If applicable, describe which groupings were chosen and why                                                         | 12                 |
| Statistical methods       | 12     | (a) Describe all statistical methods, including those used to control for confounding                                                                                                | 6                  |
|                           |        | (b) Describe any methods used to examine subgroups and interactions                                                                                                                  | 6                  |
|                           |        | (c) Explain how missing data were addressed                                                                                                                                          | 13                 |
|                           |        | (d) If applicable, explain how loss to follow-up was addressed                                                                                                                       | n/a                |
|                           |        | (e) Describe any sensitivity analyses                                                                                                                                                | 6                  |
| <b>Results</b>            |        |                                                                                                                                                                                      |                    |

|                          |     |                                                                                                                                                                                                              |       |
|--------------------------|-----|--------------------------------------------------------------------------------------------------------------------------------------------------------------------------------------------------------------|-------|
| Participants             | 13* | (a) Report numbers of individuals at each stage of study—eg numbers potentially eligible, examined for eligibility, confirmed eligible, included in the study, completing follow-up, and analysed            | 8     |
|                          |     | (b) Give reasons for non-participation at each stage                                                                                                                                                         | n/a   |
|                          |     | (c) Consider use of a flow diagram                                                                                                                                                                           | n/a   |
| Descriptive data         | 14* | (a) Give characteristics of study participants (eg demographic, clinical, social) and information on exposures and potential confounders                                                                     | 8     |
|                          |     | (b) Indicate number of participants with missing data for each variable of interest                                                                                                                          | 8     |
|                          |     | (c) Summarise follow-up time (eg, average and total amount)                                                                                                                                                  | n/a   |
| Outcome data             | 15* | Report numbers of outcome events or summary measures over time                                                                                                                                               | 8     |
| Main results             | 16  | (a) Give unadjusted estimates and, if applicable, confounder-adjusted estimates and their precision (eg, 95% confidence interval). Make clear which confounders were adjusted for and why they were included | 6     |
|                          |     | (b) Report category boundaries when continuous variables were categorized                                                                                                                                    | 13    |
|                          |     | (c) If relevant, consider translating estimates of relative risk into absolute risk for a meaningful time period                                                                                             | (9)   |
| Other analyses           | 17  | Report other analyses done—eg analyses of subgroups and interactions, and sensitivity analyses                                                                                                               | n/a   |
| <b>Discussion</b>        |     |                                                                                                                                                                                                              |       |
| Key results              | 18  | Summarise key results with reference to study objectives                                                                                                                                                     | 10    |
| <b>Limitations</b>       |     |                                                                                                                                                                                                              |       |
| Interpretation           | 20  | Give a cautious overall interpretation of results considering objectives, limitations, multiplicity of analyses, results from similar studies, and other relevant evidence                                   | 11-12 |
| Generalisability         | 21  | Discuss the generalisability (external validity) of the study results                                                                                                                                        | 13    |
| <b>Other information</b> |     |                                                                                                                                                                                                              |       |
| Funding                  | 22  | Give the source of funding and the role of the funders for the present study and, if applicable, for the original study on which the present article is based                                                | 3     |

\*Give information separately for cases and controls in case-control studies and, if applicable, for exposed and unexposed groups in cohort and cross-sectional studies.

**Note:** An Explanation and Elaboration article discusses each checklist item and gives methodological background and published examples of transparent reporting. The STROBE checklist is best used in conjunction with this article (freely available on the Web sites of PLoS Medicine at <http://www.plosmedicine.org/>, Annals of Internal Medicine at <http://www.annals.org/>, and Epidemiology at <http://www.epidem.com/>). Information on the STROBE Initiative is available at [www.strobe-statement.org](http://www.strobe-statement.org).
