# Supplementary material for: Surgical quality in organ procurement during day and night: an analysis of quality forms
Source: PubMed Central journal article supplement — BMJ Open. 2018 Nov 25;8(11):e022182. doi: 10.1136/bmjopen-2018-022182 (PMC6254412; doi:10.1136/bmjopen-2018-022182), 2018-11-25
Supplement: bmjopen-2018-022182supp001.pdf [file bmjopen-2018-022182supp001.pdf]

**Table S1**

|              |      |      |      |      |      |      |       |       |       |       |       |       |
|--------------|------|------|------|------|------|------|-------|-------|-------|-------|-------|-------|
| <b>Organ</b> | 1    | 2    | 3    | 4    | 5    | 6    | 7     | 8     | 9     | 10    | 11    | 12    |
| <b>Time</b>  | 1.1h | 2.4h | 3.0h | 3.0h | 3.0h | 4.3h | 12.4h | 14.3h | 15.2h | 15.2h | 15.2h | 22.5h |
