# Supplementary figures and images for: Surgical quality in organ procurement during day and night: an analysis of quality forms
Source: PubMed Central journal article supplement — BMJ Open. 2018 Nov 25;8(11):e022182. doi: 10.1136/bmjopen-2018-022182 (PMC6254412; doi:10.1136/bmjopen-2018-022182), 2018-11-25

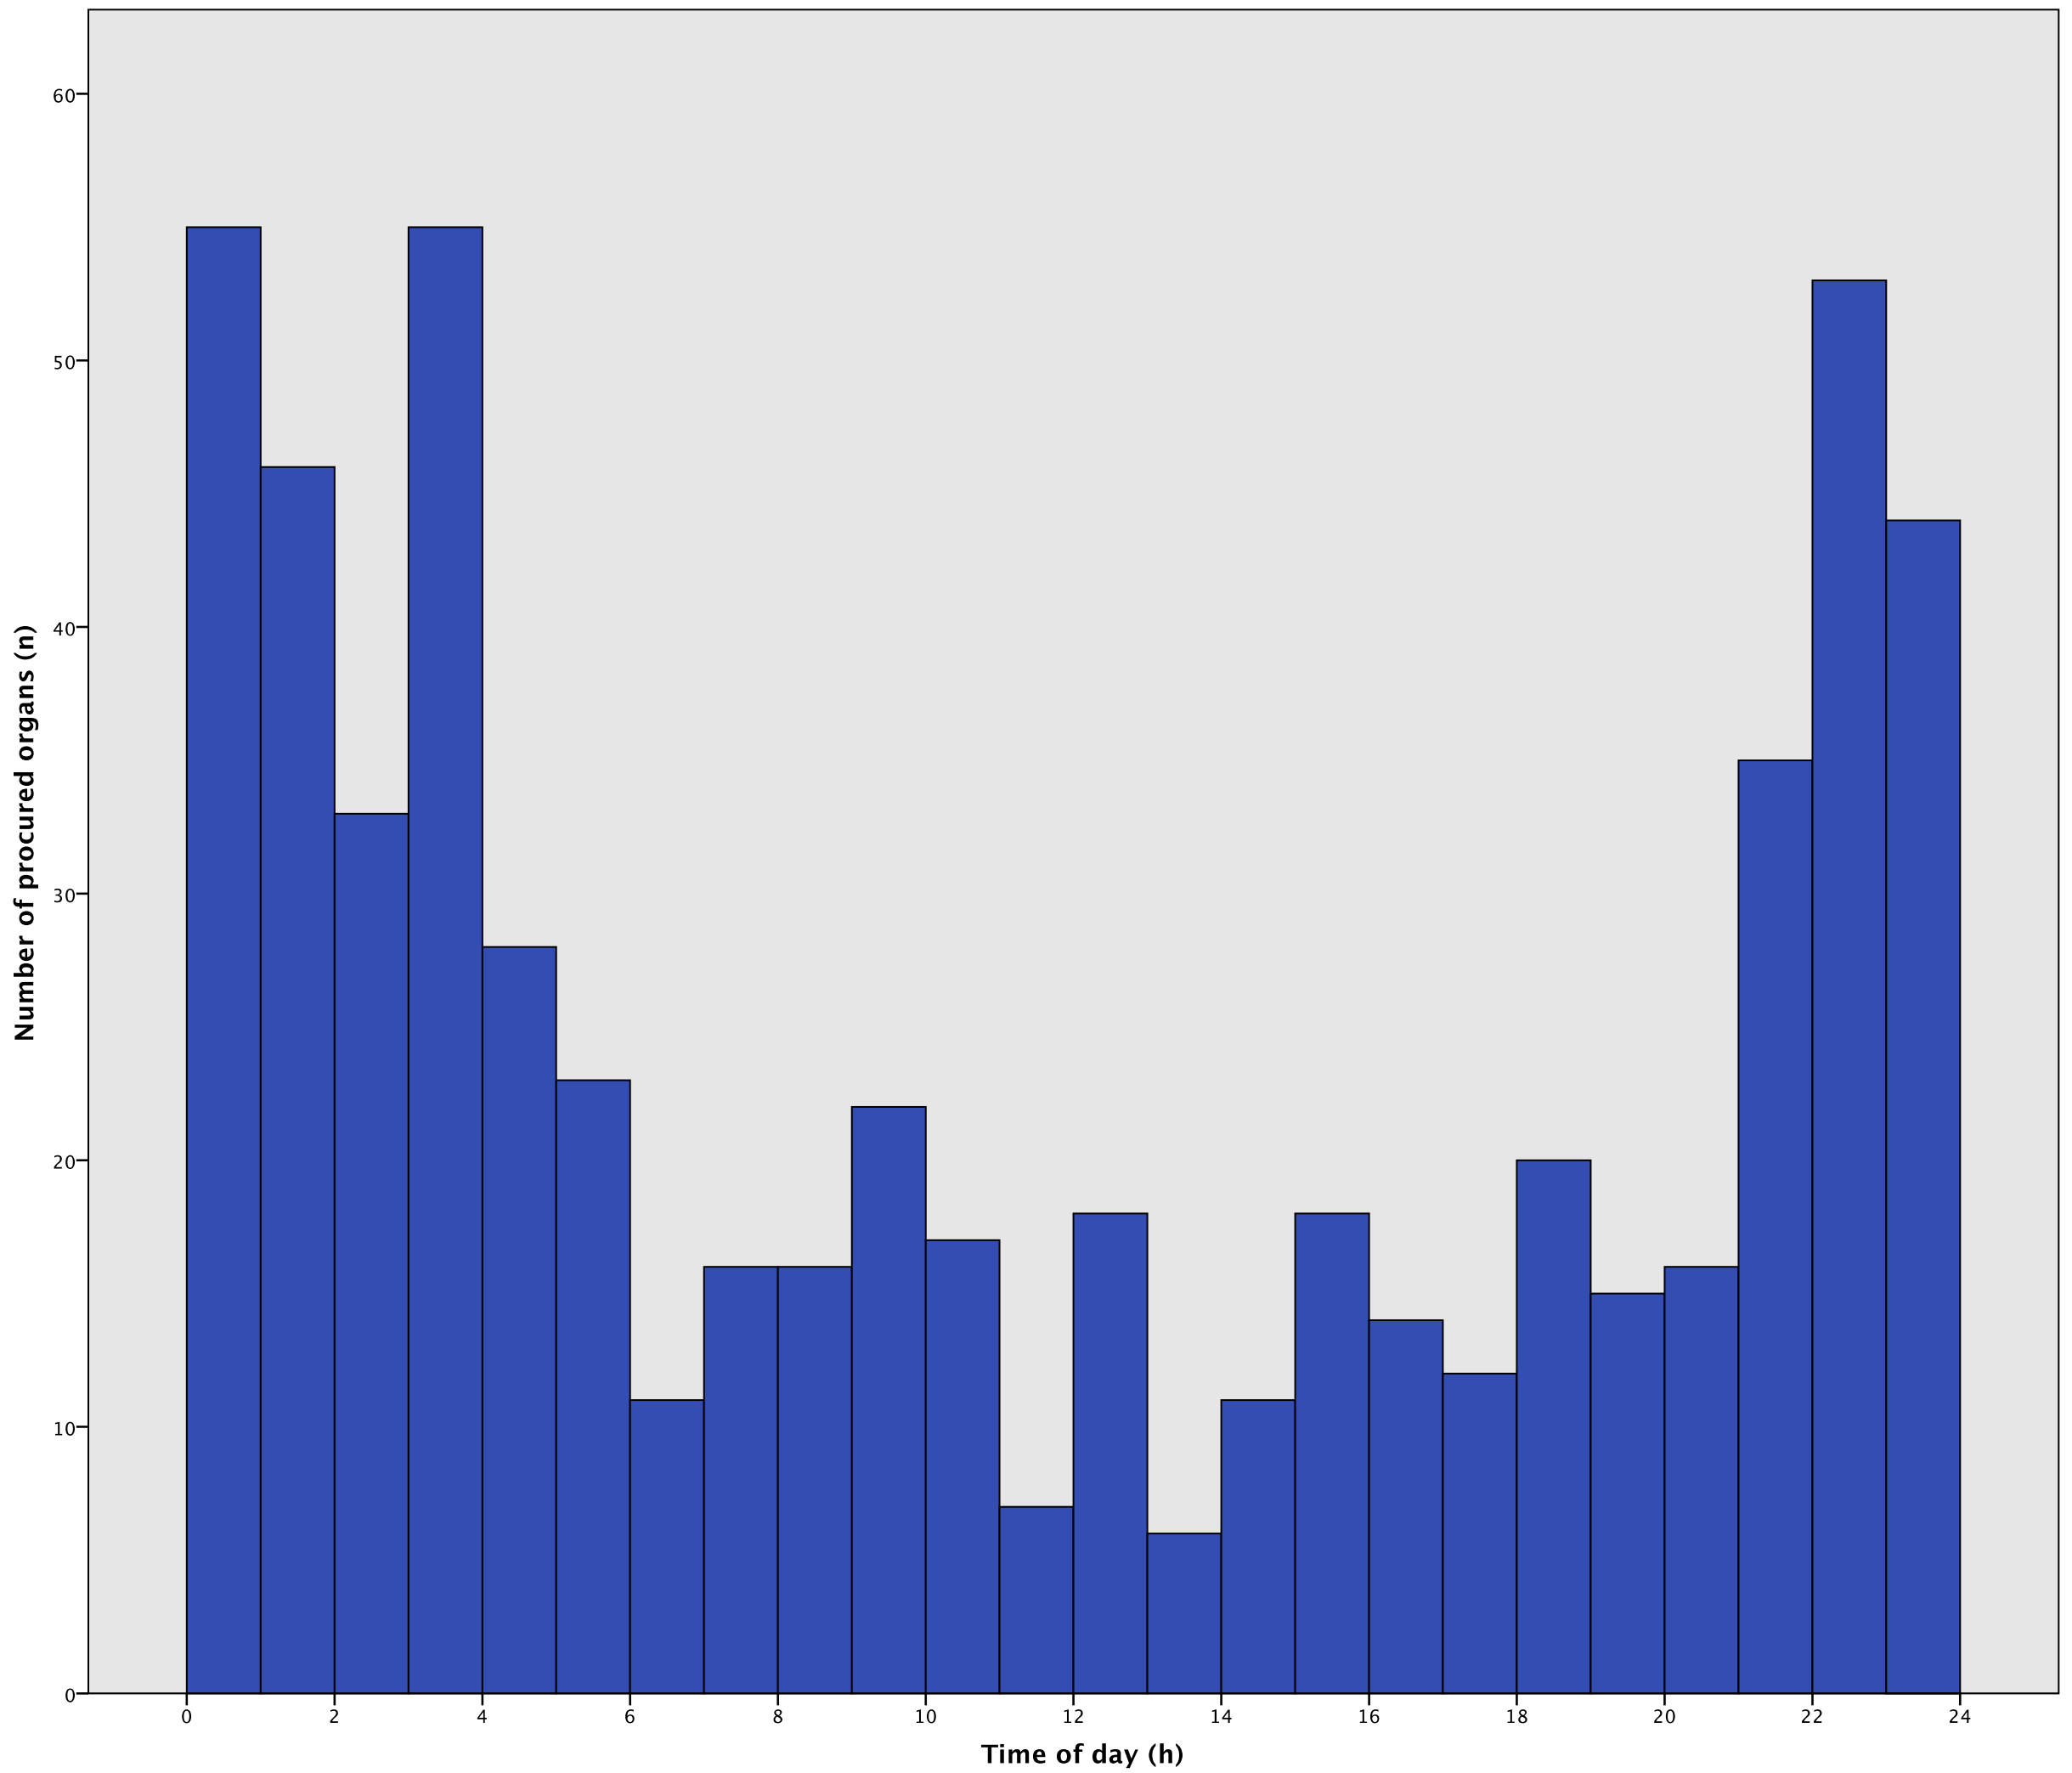

Supplement: bmjopen-2018-022182supp002.pdf [file bmjopen-2018-022182supp002.pdf]
